# Supplementary material
Source: Research Square preprint supplement (doi:10.21203/rs.3.rs-8620646/v1)
Supplement: Supplementary file 1 [file 235c24aa4949277ea85d5a4e.docx]

**SUPPLEMENTARY INFORMATION**

**Materials and Methods**

*Eligibility criteria*

Eligible patients included those with T-ALL/LBL in first relapse or refractory after induction failure, ETP-ALL, age > 18 years, bone marrow infiltration >5%, and ECOG performance status (PS) < 3. Central nervous system (CNS) involvement did not preclude enrollment.

*Data collection*

Study data were collected and managed using the Research Electronic Data Capture (REDCap) tools hosted at the GIMEMA Foundation REDCap1.

*Sample collection and ex vivo drug response profiling*

*Ex vivo* DRP was performed on freshly isolated primary cells derived from the patient’s bone marrow (BM), peripheral blood (PB). In three patients, pleural effusion was used as the sole source of disease material due to the unavailability of alternative sampling sites. Leukemic blasts were isolated through Histopaque density gradient centrifugation (Histopaque-1077, Sigma-Aldrich Corporation, USA). Cells were then cultured in RPMI 1640 medium (Fisher Scientific, Waltham, MA, USA) supplemented with 1% Penicillin/Streptomycin (Fisher Scientific, Waltham, MA, USA) and 10% of pooled patient’s serum and heat-inactivated Fetal Bovine Serum (Thermo Scientific, Waltham, USA). A total of 16,000 cells per well were arrayed in two 384-well plates (Greiner Bio-One, Belgium) in a volume of 80 μL per well using the MultiDrop Combi Reagent Dispenser (Thermo Scientific, Waltham, USA) peristaltic dispenser. A small-molecule library of 76 compounds in advanced clinical phases (phases 1 to 3) or Food and Drug Administration (FDA)/European Medicines Agency (EMA) approved drugs and investigational compounds was used for DRP. The library included kinase inhibitors, differentiating and epigenetic modifiers, chemotherapeutics, apoptotic machinery, proteasome, and Notch1 inhibitors active in oncological and hematological malignancies. Small molecule compounds were purchased from MedChem Express (MedChem Tronica, Sollentuna, Sweden) and Selleck Chemicals (SelleckChem, Houston, TX, USA); CAD2045202,3 was obtained from Enamine Ltd (Kyiv, Ukraine). Compounds were dissolved in dimethyl sulfoxide (DMSO) according to the manufacturer’s instructions; DMSO was used as a negative control. Assay-ready 384-well plates were prepared by dispensing each compound in four dilutions ranging from 0·1 to 10,000 nM and stored at -80°C. For a detailed list of compounds and their classification, see **Supplementary Data 1**. The compounds were dispensed in duplicate for each concentration using the Assist Plus pipetting robot (Integra Biosciences Co. Ltd., Shanghai, China), with an accuracy of 6% and a precision ≤6% at working volumes. Cell viability was assessed after 48-72 hours of incubation in a humidified environment at 37 °C and 5% CO2 using the CellTiter-Glo ATP-based assay (Promega Corporation, Madison, WI, USA) with Victor X4 (Perkin Elmer, Waltham, MA, USA).

Due to limited quantities and the irreplaceable nature of some primary patient samples, not all materials can be shared. Any residual material may be considered for sharing upon reasonable request to the corresponding author, subject to ethics approval, participant consent, and a Material Transfer Agreement, and where permitted by applicable regulations.

*Genomic characterization*

The combined interphase (CI)-FISH assay was applied to diagnostic samples of PB and/or BM, as previously described4. Copy number variations (CNVs), i.e., gains and losses, and copy-neutral Loss of Heterozygosity (cnLOH), were studied by SNP array (SNPa)5. Next Generation Sequencing (NGS) analysis used a custom targeted NGS library (CHEMA_B_V1, Sophia Genetics) to investigate genes recurrently mutated in ALL6.

*Data Processing*

Drug Sensitivity Score (DSS), area under the curve (AUC), and half-maximal inhibitory concentration (IC50) values were calculated using the DSS-v2.0 implementation of Breeze's R code for DSS analysis7. DSS values were used to generate heatmaps integrating genetic and clinical annotations. For relative sensitivity analyses, DSS values were standardized by row-wise (patient-wise) z-scores, thereby highlighting relative drug sensitivities within each patient profile. Clustering analyses from scaled data were restricted to compounds with robust response above assay noise across the cohort, defined as those with a mean DSS ≥ 5. Hierarchical clustering of samples (rows) and compounds (columns) was performed using Ward’s linkage method. For analyses of unscaled DSS values, where the presence of multiple zero entries made Euclidean distances less appropriate, clustering was performed using the 'complete' linkage method with 'cosine' distance.

Associations between drug sensitivity and clinical or genetic characteristics or clustering groups were evaluated using both the Mann-Whitney U test (MWU) and a permutation test. A Benjamini-Hochberg (BH) correction with a threshold of 0·05 was applied to all multiple drug comparisons. Accordingly, a p-value < 0·05 in both tests was considered significant in tests involving only one drug. The nonparametric MWU test was chosen due to the small sample size and the non-normal distribution of DSS values, and was performed with a 'two-sided' alternative hypothesis and the 'exact' method for p-value computation. The permutation test was performed with the difference in means as the test statistic and with 10,000 permutations. Comparisons between three or more groups were tested by applying the Kruskal-Wallis H-test, followed by pairwise post-hoc MWU with BH correction. Analyses were performed in Python 3.12.4 using numpy v1.26.4 and scipy v1.15.2, with visualization carried out in matplotlib v3.10.1 and seaborn v0.3.12. To test the independent effects of explanatory variables, an additive linear model (DSS ~ GeneGroup + Phenotype) was fitted, and significance was assessed by Freedman-Lane permutation tests (10,000 permutations; Type II sums of squares) using the aovperm function of the permuco R package, version 1.1.3, in R version 4.4.2. Adjusted means were computed with emmeans version 1.11.2.8.

*Drug selection and N-of-1 clinical application*

Once the chemogenomic assessment was available, a functional precision medicine review board (FPMRB), composed of hematologists and biologists from the genomic and functional labs, and the treating physician, was set up to discuss the results and suggest the DRP-informed option for clinical application. Prioritization of the suggested compounds relied on the following features: compound ranking based on DSS, availability of potentially efficacious compounds in terms of routine use for the treatment of hematological malignancies, off-label request processing time, and regulatory procedure according to the national regulations, and clinical data referred to the schedule and toxicity of combinatorial therapies already tested or under investigation. Previous treatment history, treating physician’s expertise, and access to recommended compounds were also taken into account when planning the N-of-1 treatments. We then assessed the impact of guided N-of-1 treatments on clinical outcomes while allowing final therapeutic decisions to remain at the treating physician's discretion. Fifteen (53·6%) patients received therapy based on their chemogenomic profile. The efficacy of N-of-1 treatment was determined by the best response obtained according to the European LeukemiaNet 2024 recommendations8.

*Statistical analysis*

Patient’s characteristics were summarized by frequencies and percentage values for categorical variables, while continuous variables were described with median values and their relative ranges.

**References**

1. Harris PA, Taylor R, Minor BL, et al. The REDCap consortium: Building an international community of software platform partners. *J Biomed Inform* 2019; **95**: 103208.

2. Marchesini M, Gherli A, Montanaro A, et al. Blockade of Oncogenic NOTCH1 with the SERCA Inhibitor CAD204520 in T Cell Acute Lymphoblastic Leukemia. *Cell Chem Biol* 2020.

3. Pagliaro L, Cerretani E, Vento F, et al. CAD204520 Targets NOTCH1 PEST Domain Mutations in Lymphoproliferative Disorders. *Int J Mol Sci* 2024; **25**(2).

4. La Starza R, Pierini V, Pierini T, et al. Design of a comprehensive fluorescence in situ hybridization assay for genetic classification of T-cell acute lymphoblastic leukemia. *The Journal of Molecular Diagnostics* 2020; **22**(5): 629-39.

5. Arniani S, Pierini V, Pellanera F, et al. Chromothripsis is a frequent event and underlies typical genetic changes in early T-cell precursor lymphoblastic leukemia in adults. *Leukemia* 2022; **36**(11): 2577-85.

6. Bardelli V, Arniani S, Pierini V, et al. Repurposing the Whole Expression Transcriptome Assay for the Genetic Diagnosis of T-Cell Acute Lymphoblastic Leukemia and Lymphoma. *J Mol Diagn* 2025; **27**(5): 360-70.

7. Chen Y, He L, Ianevski A, et al. Robust scoring of selective drug responses for patient-tailored therapy selection. *Nat Protoc* 2024; **19**(1): 60-82.

8. Gokbuget N, Boissel N, Chiaretti S, et al. Management of ALL in adults: 2024 ELN recommendations from a European expert panel. *Blood* 2024; **143**(19): 1903-30.

**Supplementary Figure 1.**

a) Heatmap showing raw (un-normalized) DSS data for patient-derived samples (rows) across selected compounds (columns). Patient data, in rows, were hierarchically clustered using the Complete method (Voor Hees Algorithm), while drugs (columns) are ordered by compound class and compound group. Row annotations indicate the following clinical annotations: sex, disease status, genetic subgroup, phenotypic subgroup, and *NOTCH1* mutational status.

b) Boxplots showing Drug Sensitivity Scores (DSS) for compounds of the "Kinase inhibitor" class, comparing *FBXW7*-wild type (n = 22, light blue) and *FBXW7*-altered (n = 5, dark blue) samples. Displayed compounds correspond to those with Benjamini-Hochberg corrected permutation test p-values below the significance threshold of 0.05. Asterisks represent FDR < 0.05.

c) Boxplots showing Drug Sensitivity Scores (DSS) for compounds of the kinase inhibitor class, comparing three genetic subgroups: *NOTCH1*-wild type (light gray), *NOTCH1*-altered but *FBXW7*-wild type (medium blue), and *FBXW7*-altered (dark blue). Displayed compounds correspond to those with significant differences by the Kruskal-Wallis test (p < 0.05). Asterisks denote compounds for which pairwise post-hoc Mann-Whitney U tests remained significant after Benjamini–Hochberg correction (*, FDR < 0.05).

**Supplementary Figure 2.**

a) Rate of patients according to the best response to the chemogenomic-driven treatment (blue) and the physician’s choice (brown).

b-c) Cytogenetic assessment of the leukemic clone (patient #006-2). b) Cytogenetic assessment of the leukemic clone: 46,XY,t6;11)(q27;q23),add(16)(p13)[2]/46,XY[9] (top), and SNParray: arr[GRCh37] 2q37.1q37.3(232423717_242783384)x1-2,9p21.3(21286688_22235520)x1-2, 16p13.3(85881_4140087)x1-2,17q22q25.3(55224369_81041938)x2-3; loss 2q37.1-q37.3, loss 9p21.3, loss 16p13.3, gain 17q22-q25.3 (bottom). c) Fluorescence in situ hybridization analysis of the leukemic clone carrying *KMT2A::AFDN* rearrangement: LSI MLL Dual Color Break Apart Rearrangement Probe (left); AFDN break apart (RP11-626J7, 5’, SpectrumOrange+RP11-164L23, 3’, SpectrumGreen) (right).

d-e) Morphological and cytogenetic findings of #038-1 patient at relapse. d) bone marrow smear showing blasts with an undifferentiated aspect and dysplastic features. e) Representative abnormal 3q26 pattern on fluorescence in situ hybridization (FISH) in #038-1. The break-apart hybridization pattern 1F1G1O (one fusion and two separated signals, one green and one orange) indicates the break and split of the EVI1 locus. Scale bar: 100 μm.

f) Dose–response curves (top) and drug sensitivity scores (DSS; bottom) for venetoclax and bortezomib. Top: The dark blue line represents the dose–response curve of the #038-1 sample, while light blue lines indicate the responses of other T-ALL samples tested in the study. Bottom: Box-and-whisker plots show DSS values for each drug across all T-ALL samples. The red dot marks the DSS of the #038-1 sample, and gray dots represent other T-ALL samples.

g) Immunophenotype assessment at relapse (left), showing the acquisition of a myeloid clone and the response after 1 cycle (center) and 2 cycles (right) of venetoclax-bortezomib combination as a bridge-to-transplant approach.

**Supplementary Table 1 | Detailed patient characteristics**

| **Patient ID** | **Diagnosis** | **Age** | **Sex** | **Disease Status** | **Type Sample** | **Percentage of blast** | **N. previous treatments** | **WBC at diagnosis (*103/μL)** | **Phenotypic subgroup** | **Oncogenic subgroup** | **Time to report (days)** |
| --- | --- | --- | --- | --- | --- | --- | --- | --- | --- | --- | --- |
| 001-1 | T-ALL | 62 | M | Relapsed | Pleural effusion | 55 | 2 | 10,710 | T-III | unclassified | 7 |
| 005-1 | T-ALL | 63 | F | Relapsed | Pleural effusion | 89 | 2 | 15,440 | T-III | unclassified | 8 |
| 005-2 | ETP-ALL | 55 | F | Relapsed | BM | 76 | 1 | 2010 | ETP | unclassified | 10 |
| 006-2 | ETP-ALL | 28 | M | Relapsed | BM | 35 | 3 | 200,000 | ETP | HOXA | 7 |
| 006-3 | T-ALL | 44 | M | Relapsed | BM | 95 | 2 | 1360 | T-III | TLX1 | 6 |
| 006-5 | ETP-ALL | 54 | M | Relapsed | BM | 18 | 1 | 24,540 | ETP | TLX3 | 15 |
| 010-1 | T-ALL | 35 | F | Refractory | PB | 85 | 3 | 10,100 | T-III | HOXA | 4 |
| 010-2 | ETP-ALL | 58 | F | Refractory | BM | 90 | 3 | 228,000 | ETP | unclassified | 8 |
| 010-3 | ETP-ALL | 61 | M | Relapsed | BM | 95 | 1 | NA | ETP | unclassified | 6 |
| 022-1 | T-ALL | 22 | M | Relapsed | BM | 54 | 3 | 6630 | T-III | unclassified | 4 |
| 027-1 | ETP-ALL | 65 | F | Relapsed | BM | 78 | 2 | NA | ETP | unclassified | 15 |
| 027-2 | T-ALL | 53 | M | Relapsed | PB | 50 | 1 | 121,800 | T-III | TLX1 | 14 |
| 027-3 | ETP-ALL | 70 | F | Refractory | BM | 18 | 1 | 1840 | ETP | unclassified | NA |
| 028-1 | ETP-ALL | 69 | M | Diagnosis | BM | 88 | 0 | 57,550 | ETP | unclassified | 8 |
| 028-2 | ETP-ALL | 74 | M | Diagnosis | BM | 50 | 0 | 2010 | ETP | unclassified | 9 |
| 028-3 | ETP-ALL | 77 | M | Diagnosis | BM | 60 | 0 | 9130 | ETP | unclassified | 9 |
| 033-1 | T-ALL | 52 | F | Relapsed | Pleural effusion | 50 | 1 | 7000 | T-III | unclassified | 7 |
| 037-1 | ETP-ALL | 44 | M | Relapsed | BM | 97 | 1 | 50,000 | ETP | unclassified | 9 |
| 038-1 | ETP-ALL | 41 | F | Relapsed | BM | 30 | 1 | 3840 | ETP | HOXA | 8 |
| 038-2 | ETP-ALL | 26 | F | Diagnosis | BM | 82 | 0 | 1450 | ETP | HOXA | 6 |
| 038-3 | ETP-ALL | 72 | M | Diagnosis | BM | 70 | 0 | 80,000 | ETP | unclassified | 6 |
| 042-1 | ETP-ALL | 57 | M | Refractory | BM | 100 | 1 | 92,400 | ETP | unclassified | 5 |
| 042-2 | ETP-ALL | 26 | M | Refractory | BM | 40 | 2 | 51,700 | ETP | unclassified | 6 |
| 051-1 | ETP-ALL | 59 | F | Relapsed | BM | 74 | 4 | 128,220 | ETP | HOXA | 5 |
| 051-2 | T-ALL | 45 | F | Refractory | BM | 98 | 3 | 42,870 | T-III | TAL/LMO | 6 |
| 051-3 | T-ALL | 23 | M | Refractory | BM | 40 | 3 | NA | T-III | TLX1 | 6 |
| 051-4 | T-ALL | 62 | M | Refractory | BM | 70 | 1 | 20,000 | T-II | unclassified | 7 |
| 055-1 | ETP-ALL | 21 | M | Diagnosis | PB | 50 | 0 | 14,720 | ETP | HOXA | 11 |
| 067-1 | ETP-ALL | 52 | M | Relapsed | BM | 24 | 1 | 8250 | ETP | unclassified | 7 |

BM: bone marrow; ETP: early T-cell precursor; NA: not available; PB: peripheral blood; WBC: white blood cells.

**Supplementary Table 2 | First-line Treatments in R/R Study Cohort**

| **First-line Treatment (n, %)** | **n = 23** |
| --- | --- |
| GIMEMA ALL1913-based | 15 (65.2) |
| NILG ALL 10/07-based | 4 (17.4) |
| GRAALL-2005 | 2 (8.7) |
| Other chemotherapeutics regimens* | 2 (13) |

* Regimens adopted: FLAI (fludarabine, cytarabine, idarubicin)-venetoclax; mitoxantrone-high dose cytarabine.

**Supplementary Table 3 | Cumulative treatments for R/R patients**

| **Treatment (n, %)** | **n = 20** |
| --- | --- |
| Nelarabine | 7 (35) |
| Hyper CVAD | 2 (10) |
| Venetoclax-based | 2 (10) |
| FLAI | 2 (10) |
| NILG ALL 10/07-based | 1 (5) |
| Other chemotherapeutics regimen* | 6 (30) |

*Regimens adopted: high dose methotrexate; HAM (high dose cytarabine-mitoxantrone); methotrexate-vinblastine; clofarabine-cytarabine; corticosteroid-vinblastine; corticosteroid-vincristine.

**Supplementary Table 4 | First-line Treatments for *de novo* ETP-ALL Study Cohort**

| **First-line Treatment (n, %)** | **n = 6** |
| --- | --- |
| GIMEMA ALL1913-based | 3 (50) |
| GIMEMA ALL1104-based | 3 (50) |

**Supplementary Table 5 | Patients’ genomic profile**

| **Patient ID** | **Diagnosis** | **Oncogenic subgroup** | **CI-FISH** | **NGS** |
| --- | --- | --- | --- | --- |
| 001-1 | T-ALL | unclassified | *TRAD::NOTCH1*  *CDKN2AB* bDEL  *PTEN* DEL  *IKZF2* DEL  *CDH5-RPL22* DEL | *NOTCH1* |
| 005-1 | T-ALL | unclassified | *TRAD*-TRANSLOCATION (65%) *CDKN2AB* mDEL (93%) *PTEN* mDEL (84%) *CREBBP* DEL *CDH5-RPL22* DEL | *BRAF, NOTCH1, SUZ12* |
| 005-2 | ETP-ALL | unclassified | *EZH2-TRB* DEL (90%) *ABL2* GAIN (90%) | *KRAS, NOTCH1* |
| 006-2 | ETP-ALL | HOXA | *KMT2A::AFDN* *CDKN2AB* del *CREBBP* del | *BCL11B, EED, JAK3, NOTCH1, NRAS, PHF6* |
| 006-3 | T-ALL | TLX1 | *TRAD::TLX1* *CDKN2AB* bDEL *ETV6-CDKN1B* DEL *PTEN* biDEL *TRB* GAIN *CDH5-RPL22* DEL | *BCL11B, ETV6, FAT1, FBXW7, NOTCH1, PHF6* |
| 006-5 | ETP-ALL | TLX3 | *BCL11B::TLX3* *PTPN2* bDEL *PTEN* DEL *RB1* bDEL, *D13S319* mDEL (SNPa) | *CTCF, EZH2, SUZ12* |
| 010-1 | T-ALL | HOXA | *PICALM::MLLT10* *CDKN2AB* del *MYB* tDUP *EZH2* pDEL (SNPa) *ETV6-CDKN1B*-*LMO3* DEL *CCND2* GAIN *LMO1-LMO2-NUP98* GAIN *NF1-SUZ12* GAIN *CDH5-RPL22* DEL *CDK6*- translocation subclone (3%) | *CNOT3, FBXW7, JAK1, JAK3, NOTCH1* |
| 010-2 | ETP-ALL | unclassified | Wild Type | *IKZF1, RUNX1* |
| 010-3 | ETP-ALL | unclassified | *MYC* AMPL (8 copies, SNPa) hyperdiploidy | *FLT3, SUZ12* |
| 022-1 | T-ALL | unclassified | *TRB::NOTCH1* *RB1-D13S319* del *IKZF2* DEL trisomy 5 trisomy 18 | No mutations identified |
| 027-1 | ETP-ALL | unclassified | *TRAD::IGH* (confirmed on RNASeq) *TCF7-TLX3* DEL *EZH2-TRB-CDK6* DEL *ETV6-CDKN1B-LMO3-CCND2* DEL | *FAT1, NOTCH1* |
| 027-2 | T-ALL | TLX1 | *TRAD::TLX1* *CDKN2AB* bDEL (55%) *CDKN1B* DEL (56%) *WT1* DEL (29%) *BCL11B* centr DEL (40%) | *NOTCH1, PTEN* |
| 027-3 | ETP-ALL | unclassified | *RUNX1* pDEL | *EZH2, JAK3, NOTCH1* |
| 028-1 | ETP-ALL | unclassified | *WT1-LM02-SPI1* del (30%) | *ETV6, KRAS, RUNX1* |
| 028-2 | ETP-ALL | unclassified | der(5)t(5;21)= T-5q (60%)/*RUNX1* GAIN (5S) tetraploidy *CREBBP* DEL | *FAT3, IKZF1, NOTCH1* |
| 028-3 | ETP-ALL | unclassified | Monosomy 7 | *KRAS, NOTCH1, SETD2* |
| 033-1 | T-ALL | unclassified | Hyperdiploidy | *AKT1, FBXW7, NOTCH1* |
| 037-1 | ETP-ALL | unclassified | *CDKN2AB* DEL(98%) *WT1* DEL (98%) *ATM-KMT2A* DEL(98%) *D13S319-RB1* DEL (98%) *NF1-SUZ12* DEL (98%) *BCL11B*-t?? (8%) *TP53*-DEL (SNPa) | *FBXW7, NF1, NOTCH1, RUNX1* |
| 038-1 | ETP-ALL | HOXA | *PICALM::MLLT10* *MECOM*-t *TCF7* DEL monosomy 7 *ETV6-CDKN1B* DEL *D13S319* DEL *IDGv* DEL *TRAD-NKX2.1* AMPL | *NOTCH1, RUNX1, SUZ12, WT1* |
| 038-2 | ETP-ALL | HOXA | *SQSTM1::NUP214* *CASP8AP2-GRIK2-SEC63-FYN* mDEL (22-26%) *WT1* mDEL (65%) *LMO3-ETV6-CDKN1B* (70%) *NF1-SUZ12* mDEL (65%) | *NF1* |
| 038-3 | ETP-ALL | unclassified | Wild Type | *FLT3, RUNX1* |
| 042-1 | ETP-ALL | unclassified | subclonal *RUNX1* translocation (2%) | *IKZF1, NOTCH1, NRAS* |
| 042-2 | ETP-ALL | unclassified | *NF1-SUZ12* DEL *RB1-D13S319* DEL *GRIK2* DEL (6%) TRISOMY 21 Small tetraploid clone (2-4%) *CREBBP* DEL | *NF1, PHF6, RUNX1* |
| 051-1 | ETP-ALL | HOXA | *DEK::NUP214* TRISOMY 4 *EZH2* DEL *WT1-LMO2* DEL *ETV6-CDKN1B-LMO3-CCND2* DEL *CDH5-RPL22* DEL | *ETV6, EZH2, NOTCH1, PHF6* |
| 051-2 | T-ALL | TAL/LMO | *TRAD::LMO2* *LEF1* DEL *TP53* DEL (90%) *NF1-SUZ12* GAIN, i(17q) 40-50%) | *FBXW7, NOTCH1, NRAS, TP53* |
| 051-3 | T-ALL | TLX1 | *TRB::TLX1 CDKN2AB* bDEL (18%) *ETV6* pDEL, *CDKN1B* DEL (18%) | *Not available* |
| 051-4 | T-ALL | unclassified | *CDKN2AB* mDEL (87%) *MYC* GAIN (5S) (80%) *MYB* tDUP (SNPa) | *RUNX1* |
| 055-1 | ETP-ALL | HOXA | *KMT2A::AFDN* *MYB* tDUP | *FAT1* |
| 067-1 | ETP-ALL | unclassified | Monosomy 7 (10%) *WT1* DEL (5%, not co-occurring with -7) | *NOTCH1, NRAS* |

**Supplementary Table 6 | Detailed Characteristics of the Chemogenomic-driven Cohort**

| **Patient ID** | **Diagnosis** | **Age** | **Sex** | **Phenotypic subgroup** | **Oncogenic subgroup** | **N. previous treatments** | **Previous allo-HSCT** | **Previous Nelarabine** | **N-of-1 Treatment** | **Best Response** | **MRD type** | **Bridge to allo-HSCT** |
| --- | --- | --- | --- | --- | --- | --- | --- | --- | --- | --- | --- | --- |
| 001-1 | T-ALL | 62 | M | T-III | unclassified | 2 | No | Yes | Dasatinib-Bortezomib-Dexamethasone | Refractory | - | No |
| 005-2 | ETP-ALL | 55 | F | ETP | unclassified | 2 | Yes | No | Venetoclax-Bortezomib | Refractory | - | No |
| 006-2 | ETP-ALL | 28 | M | ETP | HOXA | 3 | Yes* | Yes | Navitoclax-Venetoclax | CR MRD neg | FC | No |
| 006-5 | ETP-ALL | 54 | M | ETP | TLX3 | 2 | Yes | No | Nelarabine-Venetoclax-Navitoclax | CR MRD neg | Mol | Yes |
| 010-1 | T-ALL | 35 | F | T-III | HOXA | 3 | No | Yes | Actinomycin D | Refractory | - | No |
| 010-2 | ETP-ALL | 58 | F | ETP | unclassified | 3 | No | No | Mitoxantrone-Etoposide-Bortezomib | Aplasia | - | No |
| 010-3 | ETP-ALL | 61 | M | ETP | unclassified | 1 | Yes | No | Venetoclax-Navitoclax-Vincristine-Dexamethasone-Peg Asparaginase | Aplasia | - | No |
| 022-1 | T-ALL | 22 | M | T-III | unclassified | 3 | Yes | Yes | Dasatinib-Bortezomib | CR MRD neg | FC/CG | No |
| 027-1 | ETP-ALL | 65 | F | ETP | unclassified | 2 | Yes | Yes | Navitoclax-Venetoclax | CR MRD pos | FC | No |
| 028-1 | ETP-ALL | 69 | M | ETP | unclassified | 2 | No | No | Navitoclax-Venetoclax | Refractory | - | No |
| 038-1 | ETP-ALL | 41 | F | ETP | HOXA | 1 | No | No | Venetoclax-Bortezomib | CR MRD neg | Mol | Yes |
| 042-1 | near-ETP | 57 | M | ETP | unclassified | 2 | No | No | Venetoclax-Navitoclax | Refractory | - | No |
| 042-2 | ETP-ALL | 26 | M | ETP | unclassified | 3 | No | No | Venetoclax-Navitoclax | Refractory | - | No |
| 051-1 | ETP-ALL | 59 | F | ETP | HOXA | 4 | Yes | Yes | Venetoclax-Bortezomib-Mitoxantrone  and  Decitabine-Venetoclax-Gilteritinib** | CR MRD neg | FC | Yes |
| 051-4 | T-ALL | 62 | M | T-II | unclassified | 2 | No | No | Cyclophosphamide-Ruxolitinib | CR MRD pos | FC | Yes |

Allo-HSCT: allogeneic hematopoietic stem cell transplantation; CG: cytogenetics; CR: complete remission; CRi: CR with incomplete hematological recovery; ETP: early T-cell precursor; FC: flow cytometry; Mol: molecular; MRD: measurable residual disease.

* The patient underwent two different allo-HSCT before the chemogenomic-guided treatment.

** The patient underwent two different DRP-guided treatments.

**Supplementary Table 7 | Response to standard of care treatment according to the treating physician.**

| **Treatment response (n, %)** | **Patients (n = 14)** | **Bridge-to-alloHSCT** |
| --- | --- | --- |
| Complete remission | 5 (35.7%) | 5 (35.7%) |
| Relapse | 0 | 0 |
| Refractory | 4 (28.6%) | 0 |
| Not evaluable | 4 (28.6%) | 0 |
| Unknown | 1 (7.1%) | 0 |

**Supplementary Data Captions**

**Supplementary Data 1: Compounds used in the drug sensitivity profiling assay.**

The file indicates compound names, their grouping into compound classes for the purposes of data analysis, phase of development, solvent and highest concentration used in the assay, compound provider and official ChEMBDL ID.

**Supplementary Data 2: Variants predicted as pathogenic or likely pathogenic.**

The file lists annotated genetic variants identified in the cohort by the custom targeted NGS assay.

**Supplementary Data 3. Results of Kruskal-Wallis H-tests on sample clusters with selected drugs.**

(A) Results of the Kruskal-Wallis H-test on the four identified clusters, for selected compounds. (B) Results of the post-hoc Mann-Whitney U test performed on drugs with significant p-value (Kruskal-Wallis P < 0.05), with adjustment for multiple hypothesis testing according to the Benjamini-Hochberg procedure.

**Supplementary Data 4. Results of Mann-Whitney U and permutation tests on Immature versus Typical phenotype groups.**

Results of the Mann-Whitney U and permutation tests for all drugs, contrasting cases with Immature phenotype (n=18) versus Typical phenotype (n=10), with adjustment for multiple hypotheses testing (Benjamini-Hochberg).

**Supplementary Data 5. Results of Mann-Whitney U and permutation tests on PTEN-wild-type and PTEN-altered groups.**

Results of the Mann-Whitney U and permutation tests for all seven PI3K/mTOR/AKT inhibitors in the drug profiling panel, performed on the groups PTEN-wild type (22 cases) and PTEN-altered (5 cases), with adjustment for multiple hypotheses testing (Benjamini-Hochberg).

**Supplementary Data 6. Results of tests on FBXW7-positive versus FBXW7-negative groups.**

(A) Results of the Mann-Whitney U and permutation tests for all drugs, performed on the groups FBXW7-wild type (22 cases) versus FBXW7-altered (5 cases), with adjustment for multiple hypotheses testing (Benjamini-Hochberg). (B) Results of the Kruskal-Wallis H-test on the three groups: NOTCH1-wt (9 cases), NOTCH1-alt + FBXW7-wt (13 cases) and FBXW7-alt (5 cases), performed on all drugs of the "Kinase Inhibitor" class that showed permutation test FDR < 0.05. (C) Results of the post-hoc Mann-Whitney U test performed on drugs with significant p-value (Kruskal-Wallis P < 0.05), with adjustment for multiple hypothesis testing according to the Benjamini-Hochberg procedure. (D) Results of the additive linear model (DSS ~ GeneGroup + Phenotype) analyzed by Freedman–Lane permutation ANOVA, used to assess the independent effects of NOTCH1/FBXW7 genotype and tumor phenotype on sample sensitivity to Dasatinib.
