# Supplementary material
Source: Research Square preprint supplement (doi:10.21203/rs.3.rs-8620646/v1)
Supplement: Supplementary file 2 [file 27dd52ae8173bfe58ea2fa7f.xlsx]

## Sheet: Sheet1
Supplementary Data 1.
Compound name	Alternative name	Mechanism target	Mechanism target	Other targets	Phase development	Solvent	Highest conc (nM)	Company	ChEMBDL ID
6-Mercaptopurine	-	A.Conv.Chemo	Nucleoside analog	Nucleoside analog	Approved	DMSO	10000	MCE	CHEMBL1200751
6-Thioguanine	NSC-752	A.Conv.Chemo	Nucleoside analog	Nucleoside analog	Approved	DMSO	10000	MCE	CHEMBL727
Actinomycin D	Dactinomycin	A.Conv.Chemo	Antibiotic, DNA repair inhibition	-	Approved	DMSO	100	MCE	CHEMBL1554
Afatinib	BIBW2992	B.Kinase inhibitor	EGFR inhibitor	EGFR; HER2	Approved	DMSO	10000	MCE	CHEMBL1173655
Alisertib	MLN8237	B.Kinase inhibitor	Aurora inhibitor	Aurora A; AKT; mTOR; AMPK	Phase 3	DMSO	10000	MCE	CHEMBL483158
AR-42	REC-2282	D.Differentiating.epigenetic modifier	HDAC inhibitor	HDAC	Phase 2	DMSO	10000	MCE	CHEMBL191482
AT9283	-	B.Kinase inhibitor	Multi-targeted protein kinase	Aurora A; Aurora B; JAK2/3; ABL; FLT3	Phase 2	DMSO	10000	MCE	CHEMBL495727
AZD-8055	-	B.Kinase inhibitor	mTOR inhibitor	mTOR; mTORC1/2	Phase 1	DMSO	10000	MCE	CHEMBL1801204
Barasertib-HQPA	AZD1152	B.Kinase inhibitor	Aurora inhibitor	Aurora B	Phase 3	DMSO	10000	MCE	CHEMBL415049
BI 2536	-	B.Kinase inhibitor	PLK inhibitor	PLK1; BRD3	Phase 2	DMSO	10000	MCE	CHEMBL513909
BMS-986158	-	D.Differentiating.epigenetic modifier	BET inhibitor	BRD2/3/4	Phase 1	DMSO	1000	MCE	CHEMBL4297458
Bortezomib	PS-341; LDP-341; NSC 681239	C.Protease.proteasome inhibitor	Proteasome inhibitor (26S subunit)	Nf-KB	Approved	DMSO	1000	MCE	CHEMBL325041
Buparlisib	BKM-120	B.Kinase inhibitor	PI3K inhibitor	p110α, p110β, p110δ and p110γ	Phase 3	DMSO	10000	MCE	CHEMBL2017974
Cabozantinib	-	B.Kinase inhibitor	Multi-targeted protein kinase (PKCα/β/γ, Syk, Flk-1, Akt, PKA, c-Kit, c-Fgr, c-Src, FLT3, PDFRβ, VEGFR1/2)	VEGFR2; MET; FLT3; KIT; RET	Approved	DMSO	10000	MCE	CHEMBL2105717
CAD204520	-	F.NOTCH1	SERCA inhibitor	NOTCH1	Preclinical	DMSO	10000	Enamine LTD	-
CB-103	-	F.NOTCH1	NOTCH1 inhibitor	-	Phase 2	DMSO	10000	MCE	CHEMBL1420319
Cerdulatinib	PRT062070; PRT2070	B.Kinase inhibitor	JAK, SYK inhibitor	JAK1/2/3;TYK2;SYK	Phase 2	DMSO	10000	MCE	CHEMBL4116008
Crenolanib	CP-868596	B.Kinase inhibitor	Flt3 inhibitor	PDGFRa/b	Phase 3	DMSO	10000	MCE	CHEMBL2105728
Crizotinib	NSC-756645	B.Kinase inhibitor	ALK inhibitor	MET; ROS1	Approved	DMSO	10000	MCE	CHEMBL601719
Cytarabine	Cytosine β-D-arabinofuranoside; Cytosine Arabinoside; Ara-C	A.Conv.Chemo	Antimetabolite, interferes with DNA synthesis	-	Approved	DMSO	10000	MCE	CHEMBL803
Dactolisib	BEZ-235; RTB-101	B.Kinase inhibitor	PI3K inhibitor	mTOR; mTORC1/2	Phase 3	DMSO	10000	MCE	CHEMBL1879463
Dasatinib	BMS-354825	B.Kinase inhibitor	Src/Bcr-Abl inhibitor	Autophagy	Approved	DMSO	10000	MCE	CHEMBL1421
Daunorubicin HCl	Daunomycin; RP 13057; Rubidomycin	A.Conv.Chemo	Topoisomerase II inhibitor	-	Approved	DMSO	1000	MCE	CHEMBL1563
Dexamethasone	Hexadecadrol; Prednisolone F	A.Conv.Chemo	Glucocorticoid, immunomodulatory agent	NR3C1;NR0B1;ANXA1;NOS2;NR1I2	Approved	DMSO	10000	MCE	CHEMBL384467
Dinaciclib	MK-7965; SCH-727965	B.Kinase inhibitor	CDK inhibitor	CDK2/5/1/9	Phase 3	DMSO	10000	MCE	CHEMBL2103840
Docetaxel	RP-56976; cdk-810	A.Conv.Chemo	Microtubule depolymerization inhibitor	BCL2; BCL-XL	Approved	DMSO	10000	MCE	CHEMBL92
Dovitinib	CHIR-258; TKI258	B.Kinase inhibitor	FGFR inhibitor	FGFR1;FGFR3;KIT;FLT3;FLT4;VEGFR1;VEGFR2;VEGFR3	Phase 3	DMSO	10000	MCE	CHEMBL522892
Doxorubicin HCl	Hydroxydaunorubicin	A.Conv.Chemo	Topoisomerase II inhibitor	-	Approved	DMSO	1000	MCE	CHEMBL359744
Entinostat	MS-275; SNDX-275	D.Differentiating.epigenetic modifier	HDAC inhibitor	HDAC1;HDAC3	Phase 3	DMSO	10000	MCE	CHEMBL27759
Entospletinib	GS-9973	B.Kinase inhibitor	SYK inhibitor	-	Phase 3	DMSO	10000	MCE	CHEMBL3265032
Epirubicin	NSC-256942; IMI-28	A.Conv.Chemo	Topoisomerase II inhibitor	Foxp3	Approved	DMSO	1000	MCE	CHEMBL417
Etoposide	VP-16; VP-16-213	A.Conv.Chemo	Topoisomerase II inhibitor	-	Approved	DMSO	10000	MCE	CHEMBL44657
Fludarabine	F-ara-A; NSC 118218	A.Conv.Chemo	Antimetabolite; Purine analog; DNA syntheisis	STAT1	Approved	DMSO	10000	MCE	CHEMBL1568
Fostamatinib	R788	B.Kinase inhibitor	SYK inhibitor	-	Approved	DMSO	10000	MCE	CHEMBL2103830
Gemcitabine	LY-188011	A.Conv.Chemo	Antimetabolite; Nucleoside analog	-	Approved	DMSO	1000	MCE	CHEMBL888
Givinostat	ITF-2357	D.Differentiating.epigenetic modifier	HDAC inhibitor	HDAC1;HDAC2;HDAC3;HDAC4;HDAC5;HDAC6;HDAC7;HDAC8;HDAC10	Phase 3	DMSO	10000	MCE	CHEMBL1213492
Idarubicin HCl	4-Demethoxydaunorubicin	A.Conv.Chemo	Topoisomerase II inhibitor	-	Approved	DMSO	1000	MCE	CHEMBL1200976
Imatinib	NSC-743414; STI-571	B.Kinase inhibitor	Multi-targeted protein kinase	Bcr-Abl; ABL; PDGFRa/b; c-KIT	Approved	DMSO	10000	MCE	CHEMBL941
INCB053914	Uzansertib	B.Kinase inhibitor	PIM inhibitor	PIM1;PIM2;PIM3	Phase 1	DMSO	10000	MCE	-
Infigratinib	BGJ-398; NVP-BGJ398	B.Kinase inhibitor	FGFR inhibitor	FGFR1;FGFR2;FGFR3	Approved	DMSO	10000	MCE	CHEMBL1852688
KW-2478	-	E.Apoptotic modulator	HSP90 inhibitor	-	Phase 1	DMSO	10000	MCE	CHEMBL4300557
LCL161	NCP-LCL 161	E.Apoptotic modulator	XIAP inhibitor	IAP	Phase 2	DMSO	10000	MCE	CHEMBL2431768
Lestaurtinib	A-154475; KT5555	B.Kinase inhibitor	Multi-targeted protein kinase	JAK2; FLT3; TRKa	Phase 3	DMSO	10000	MCE	CHEMBL603469
Luminespib	VER-52296; NVP-AUY-922	E.Apoptotic modulator	HSP90 inhibitor	-	Phase 2	DMSO	10000	MCE	CHEMBL252164
Methotrexate	CL-14377; NSC-740	A.Conv.Chemo	Nucleoside analog	Antifolate	Approved	DMSO	10000	MCE	CHEMBL34259
Midostaurin	PKC412; CGP 41251	B.Kinase inhibitor	Multi-targeted protein kinase (PKCα/β/γ, Syk, Flk-1, Akt, PKA, c-Kit, c-Fgr, c-Src, FLT3, PDFRβ, VEGFR1/2)	eNOS upregulation	Approved	DMSO	10000	MCE	CHEMBL608533
Mitoxantrone	Mitozantrone; NSC 301739	A.Conv.Chemo	Topoisomerase II inhibitor	-	Approved	DMSO	10000	MCE	CHEMBL58
MK-0752	-	F.NOTCH1	Gamma secretase inhibitor	NOTCH1	Phase 1	DMSO	10000	MCE	CHEMBL4205422
MK-2206	-	B.Kinase inhibitor	AKT inhibitor	AKT1;AKT2;AKT3	Phase 2	DMSO	10000	MCE	CHEMBL1079175
Navitoclax	ABT-263	E.Apoptotic modulator	Bcl-2.Bcl-xL inhibitor	BCL2;BCL2L2;BAD;BCL2L1;MCL1	Phase 3	DMSO	10000	MCE	CHEMBL443684
Nelarabine	506U; GW-605U78	A.Conv.Chemo	Antimetabolite, interferes with DNA synthesis	-	Approved	DMSO	10000	MCE	CHEMBL1201112
Nilotinib	AMN107	B.Kinase inhibitor	Bcr-Abl inhibitor	-	Approved	DMSO	10000	MCE	CHEMBL255863
NVP-HSP990	-	E.Apoptotic modulator	HSP90 inhibitor	Grp94	Preclinical	DMSO	10000	MCE	-
Obatoclax	GX15-070	E.Apoptotic modulator	Bcl-2.Bcl-xL inhibitor		Phase 3	DMSO	10000	MCE	CHEMBL408194
Olaparib	AZ2281	E.Apoptotic modulator	PARP inhibitor	PARP1;PARP2	Approved	DMSO	10000	MCE	CHEMBL521686
Onalespib	AT-13387	E.Apoptotic modulator	HSP90 inhibitor	Hsp90	Phase 2	DMSO	10000	MCE	CHEMBL1214827
Palbociclib	PD-0332991	B.Kinase inhibitor	CDK inhibitor	CDK4;CDK6	Approved	DMSO	10000	MCE	CHEMBL189963
Panobinostat	LBH589; NVP-LBH589	D.Differentiating.epigenetic modifier	HDAC inhibitor	HDAC1;HDAC2;HDAC3;Autophagy	Approved	DMSO	1000	MCE	CHEMBL483254
Pentostatin	CI-825; PD-81565	A.Conv.Chemo	Nucleoside analog	Adenosine deaminase	Approved	DMSO	10000	MCE	CHEMBL1580
PU-H71	Zelavespib	E.Apoptotic modulator	HSP90 inhibitor	-	Phase 1	DMSO	10000	MCE	CHEMBL200102
RAF265	CHIR-265	B.Kinase inhibitor	RAF inhibitor	VEGFR2; RAF1;BRAF;KDR	Phase 2	DMSO	10000	MCE	CHEMBL558752
Rapamycin	AY-22989; NPC-12G; Sirolimus	B.Kinase inhibitor	mTOR inhibitor	mTORC	Approved	DMSO	10000	MCE	CHEMBL413
RO4929097	RG-4733	F.NOTCH1	Gamma secretase inhibitor	NOTCH1	Phase 2	DMSO	10000	MCE	CHEMBL4297422
Ruxolitinib	INCB18424	B.Kinase inhibitor	JAK1 & 2 inhibitor	-	Approved	DMSO	10000	MCE	CHEMBL1789941
Sepantronium	YM155	E.Apoptotic modulator	Survivin inhibitor	-	Phase 2	DMSO	10000	MCE	CHEMBL2110734
SNS-032	-	B.Kinase inhibitor	CDK inhibitor	-	Phase 1	DMSO	10000	MCE	CHEMBL296468
Sunitinib	NSC-736511; SU-11248	B.Kinase inhibitor	VEGFR inhibitor	PDGFRb; Ire1a	Approved	DMSO	10000	MCE	CHEMBL535
TAK-659	Mivavotinib; CB-659	B.Kinase inhibitor	SYK inhibitor	FLT3	Phase 2	DMSO	10000	MCE	CHEMBL3979920
Temsirolimus	CCI-779	B.Kinase inhibitor	mTOR inhibitor	-	Approved	DMSO	1000	MCE	CHEMBL1201182
Tirbanibulin	KX-01; KX-2391	B.Kinase inhibitor	SRC inhibitor	-	Approved	DMSO	10000	MCE	CHEMBL571546
Topotecan	NSC-609699; SKF-104864	A.Conv.Chemo	Topoisomerase I inhibitor	Topoisomerase	Approved	DMSO	10000	MCE	CHEMBL84
TP-3654	SGI-9481	B.Kinase inhibitor	PIM inhibitor	PIM1	Phase 1	DMSO	10000	MCE	CHEMBL3975308
Umbralisib	RP5264; TGR 1202	B.Kinase inhibitor	PI3K inhibitor	CK1e	Approved	DMSO	10000	MCE	CHEMBL3948730
Venetoclax	ABT-199; GDC-0199	E.Apoptotic modulator	Bcl-2-selective inhibitor	-	Approved	DMSO	10000	MCE	CHEMBL3137309
Vincristine	Leucristine	A.Conv.Chemo	Vinca alcaoid	-	Approved	DMSO	1000	MCE	CHEMBL90555
XL228	EXEL-2280	B.Kinase inhibitor	Multi-targeted protein kinase (BCR-ABL; Aurora A; IGF-1R; SRC; LYN)	BCR-ABL; Aurora A; IGF-1R; SRC; LYN	Phase 1	DMSO	10000	MCE	CHEMBL3545085
