# Supplementary material
Source: Research Square preprint supplement (doi:10.21203/rs.3.rs-8620646/v1)
Supplement: Supplementary file 3 [file 69ac026d953004da2d999fcb.xlsx]

## Sheet: Description
Supplementary Data 4. Results of Mann-Whitney U and permutation tests on Immature versus Typical phenotype groups.
Results of the Mann-Whitney U and permutation tests for all drugs, contrasting cases with Immature phenotype (n=18) versus Typical phenotype (n=10), with adjustment for multiple hypotheses testing (Benjamini-Hochberg).
Description of sheets and columns
Sheet name:	Phenotypic Subgroup
	Columns:	Column	Column description
		Drug	Drug name
		Class	Drug class
		Group	Target/mechanism of action subgroup within class
		n1	Number of samples in group 1 (Immature phenotype)
		n2	Number of samples in group 2 (Typical phenotype)
		n1_mean	Mean DSS of group 1 (Immature phenotype)
		n2_mean	Mean DSS of group 2 (Typical phenotype)
		U	Mann-Whitney U-test statistic
		p	Mann-Whitney U-test p-value
		fdr	p-value of the Mann-Whitney U test, adjusted according to the Benjamini-Hochberg procedure
		perm_stat	permutation test statistic
		perm_p	permutation test p-value
		perm_fdr	permutation test p-value, adjusted according to the Benjamini-Hochberg procedure
		perm_fdr_sig_*	Visual representation of the significativity of the permutation test FDR value: *<0.05, **<0.01, ***<0.001.

## Sheet: Phenotypic Subgroup
Drug	Class	Group	n1	n2	n1_mean	n2_mean	U	p	fdr	perm_stat	perm_p	perm_fdr	perm_fdr_sig_*
Actinomycin D	A.Conv.Chemo	Antibiotic	18	10	13.6778	28.18	49.5	0.057264	0.18922	-14.5	0.035396	0.141586
Dexamethasone	A.Conv.Chemo	Glucocorticoid	18	10	15.2056	33.16	48	0.045221	0.180883	-17.95	0.040796	0.145076
Docetaxel	A.Conv.Chemo	Microtubule depolymerization inhibitor	18	10	5.61667	11.09	75.5	0.524107	0.698809	-5.47	0.262574	0.433817
Vincristine	A.Conv.Chemo	Microtubule depolymerization inhibitor	18	10	7.35556	22.49	42	0.020779	0.120755	-15.13	0.007599	0.053195
6-Mercaptopurine	A.Conv.Chemo	Nucleoside analog	18	10	0.122222	0.15	103.5	0.555432	0.703548	-0.03	0.881912	0.925234
6-Thioguanine	A.Conv.Chemo	Nucleoside analog	18	10	2.95	3.44	80.5	0.688786	0.758663	-0.49	0.688531	0.829469
Cytarabine	A.Conv.Chemo	Nucleoside analog	18	10	5.78889	14.75	43	0.023833	0.120755	-8.96	0.030797	0.13768
Fludarabine	A.Conv.Chemo	Nucleoside analog	18	10	15.6444	14.61	103	0.555432	0.703548	1.03	0.808319	0.877604
Gemcitabine	A.Conv.Chemo	Nucleoside analog	18	10	4.01667	10.85	52.5	0.079979	0.217086	-6.83	0.136786	0.280966
Methotrexate	A.Conv.Chemo	Nucleoside analog	18	10	0.072222	0	100	0.654352	0.758663	0.07	0.805519	0.877604
Nelarabine	A.Conv.Chemo	Nucleoside analog	18	10	3.03333	4.67	68.5	0.3318	0.52535	-1.64	0.343766	0.544296
Pentostatin	A.Conv.Chemo	Nucleoside analog	18	10	1.01111	1.04	64	0.225868	0.451737	-0.03	0.950105	0.962773
Daunorubicin	A.Conv.Chemo	Topoisomerase inhibitor	18	10	15.5278	25.83	76	0.524107	0.698809	-10.3	0.194781	0.35246
Doxorubicin	A.Conv.Chemo	Topoisomerase inhibitor	18	10	5.61111	9.13	74	0.464182	0.653293	-3.52	0.107389	0.265238
Epirubicin	A.Conv.Chemo	Topoisomerase inhibitor	18	10	7.10556	13.29	65	0.244924	0.465355	-6.18	0.065193	0.215422
Etoposide	A.Conv.Chemo	Topoisomerase inhibitor	18	10	3.37778	5.69	66.5	0.286222	0.50588	-2.31	0.172783	0.328287
Idarubicin	A.Conv.Chemo	Topoisomerase inhibitor	18	10	14.9611	21.15	80.5	0.688786	0.758663	-6.19	0.392161	0.586018
Mitoxantrone	A.Conv.Chemo	Topoisomerase inhibitor	18	10	55.5167	53.4	98	0.72386	0.785905	2.12	0.717328	0.829469
Topotecan	A.Conv.Chemo	Topoisomerase inhibitor	18	10	8.98889	22.1	52.5	0.079979	0.217086	-13.11	0.041996	0.145076
Dinaciclib	B.Kinase inhibitor	CDK inhibitor	18	10	49.5222	62.4	57	0.120528	0.27758	-12.88	0.108189	0.265238
Palbociclib	B.Kinase inhibitor	CDK inhibitor	18	10	4.6	4.96	82.5	0.759494	0.801688	-0.36	0.607739	0.760173
SNS-032	B.Kinase inhibitor	CDK inhibitor	18	10	21.3222	43.04	33	0.005177	0.065573	-21.72	0.008399	0.053195
Afatinib	B.Kinase inhibitor	Kinase inhibitor	18	10	7.90556	8.11	84	0.795635	0.828333	-0.2	0.888711	0.925234
Alisertib	B.Kinase inhibitor	Kinase inhibitor	18	10	1.43333	4.53	65	0.244924	0.465355	-3.1	0.147585	0.29517
AT9283	B.Kinase inhibitor	Kinase inhibitor	18	10	4.64444	16.18	41	0.018056	0.120755	-11.54	0.034997	0.141586
Barasertib-HQPA	B.Kinase inhibitor	Kinase inhibitor	18	10	1.58889	5.89	92	0.94371	0.956292	-4.3	0.422158	0.594148
BI 2536	B.Kinase inhibitor	Kinase inhibitor	18	10	15.05	23.9	64	0.225868	0.451737	-8.85	0.081192	0.220378
Cabozantinib	B.Kinase inhibitor	Kinase inhibitor	18	10	3.11111	2.43	90	1	1	0.68	0.606739	0.760173
Cerdulatinib	B.Kinase inhibitor	Kinase inhibitor	18	10	5.05	12.56	69	0.3318	0.52535	-7.51	0.133787	0.280966
Crenolanib	B.Kinase inhibitor	Kinase inhibitor	18	10	5.45556	9.55	42.5	0.023833	0.120755	-4.09	0.112189	0.266448
Crizotinib	B.Kinase inhibitor	Kinase inhibitor	18	10	5.20556	6.44	77.5	0.58762	0.732117	-1.23	0.415158	0.594148
Dasatinib	B.Kinase inhibitor	Kinase inhibitor	18	10	7.18333	37.08	14.5	0.0001	0.006585	-29.9	0.0002	0.007599	**
Dovitinib	B.Kinase inhibitor	Kinase inhibitor	18	10	10.8889	9.76	103	0.555432	0.703548	1.13	0.861914	0.922612
Entospletinib	B.Kinase inhibitor	Kinase inhibitor	18	10	2.75556	3.31	57.5	0.132742	0.296718	-0.55	0.720328	0.829469
Fostamatinib	B.Kinase inhibitor	Kinase inhibitor	18	10	3.33889	4.61	80	0.654352	0.758663	-1.27	0.578142	0.760173
Imatinib	B.Kinase inhibitor	Kinase inhibitor	18	10	1.13889	1.16	49.5	0.057264	0.18922	-0.02	0.766323	0.856479
INCB053914	B.Kinase inhibitor	Kinase inhibitor	18	10	5.9	6.54	100	0.654352	0.758663	-0.64	0.713929	0.829469
Infigratinib	B.Kinase inhibitor	Kinase inhibitor	18	10	2.36111	3.28	71.5	0.408141	0.60821	-0.92	0.393761	0.586018
Lestaurtinib	B.Kinase inhibitor	Kinase inhibitor	18	10	4.50556	6.24	69	0.3318	0.52535	-1.73	0.610139	0.760173
Midostaurin	B.Kinase inhibitor	Kinase inhibitor	18	10	5.65	4.62	72.5	0.435657	0.63673	1.03	0.90231	0.926697
Nilotinib	B.Kinase inhibitor	Kinase inhibitor	18	10	3.66111	2.25	80.5	0.688786	0.758663	1.41	1	1
RAF265	B.Kinase inhibitor	Kinase inhibitor	18	10	9.82778	6.3	127	0.079979	0.217086	3.53	0.124588	0.27849
Ruxolitinib	B.Kinase inhibitor	Kinase inhibitor	18	10	1.02222	4.96	60	0.159891	0.337548	-3.94	0.030197	0.13768
Sunitinib	B.Kinase inhibitor	Kinase inhibitor	18	10	5.83333	9.52	50.5	0.064177	0.203226	-3.69	0.09659	0.253133
TAK-659	B.Kinase inhibitor	Kinase inhibitor	18	10	1.91667	10.71	29.5	0.003038	0.057713	-8.79	0.002	0.037996	*
Tirbanibulin	B.Kinase inhibitor	Kinase inhibitor	18	10	8.63889	19.99	48.5	0.050956	0.184411	-11.35	0.025197	0.136786
TP-3654	B.Kinase inhibitor	Kinase inhibitor	18	10	4.53333	7.15	69.5	0.356195	0.541417	-2.62	0.251775	0.42522
XL228	B.Kinase inhibitor	Kinase inhibitor	18	10	6.78333	13.62	56	0.109183	0.267675	-6.84	0.080992	0.220378
AZD-8055	B.Kinase inhibitor	PI3K/mTOR/AKT inhibitor	18	10	6.75556	22.05	45	0.031068	0.138891	-15.29	0.007199	0.053195
Buparlisib	B.Kinase inhibitor	PI3K/mTOR/AKT inhibitor	18	10	2.31111	8.41	38.5	0.0135	0.102602	-6.1	0.005999	0.053195
Dactolisib	B.Kinase inhibitor	PI3K/mTOR/AKT inhibitor	18	10	4.88889	11.04	66.5	0.286222	0.50588	-6.15	0.188981	0.350306
MK-2206	B.Kinase inhibitor	PI3K/mTOR/AKT inhibitor	18	10	7.82222	16.07	43	0.023833	0.120755	-8.25	0.081192	0.220378
Rapamycin	B.Kinase inhibitor	PI3K/mTOR/AKT inhibitor	18	10	8.61667	15.04	59	0.14585	0.316702	-6.42	0.162184	0.31605
Temsirolimus	B.Kinase inhibitor	PI3K/mTOR/AKT inhibitor	18	10	5.32778	14.98	43.5	0.027254	0.129456	-9.65	0.005199	0.053195
Umbralisib	B.Kinase inhibitor	PI3K/mTOR/AKT inhibitor	18	10	1.80556	2.42	82.5	0.759494	0.801688	-0.61	0.629537	0.771691
Bortezomib	C.Protease.proteasome inhibitor	Proteasome inhibitor	18	10	8.28333	13.46	47.5	0.045221	0.180883	-5.18	0.074193	0.220378
BMS-986158	D.Differentiating.epigenetic modifier	BET inhibitor	18	10	22.6056	29.23	69	0.3318	0.52535	-6.62	0.352365	0.546525
AR-42	D.Differentiating.epigenetic modifier	HDAC inhibitor	18	10	23.4444	27.03	75	0.493672	0.682165	-3.59	0.508549	0.702722
Entinostat	D.Differentiating.epigenetic modifier	HDAC inhibitor	18	10	11.9556	21.02	49	0.050956	0.184411	-9.06	0.029997	0.13768
Givinostat	D.Differentiating.epigenetic modifier	HDAC inhibitor	18	10	27.6611	39.86	66	0.265043	0.491299	-12.2	0.131587	0.280966
Panobinostat	D.Differentiating.epigenetic modifier	HDAC inhibitor	18	10	25.6	37.21	54.5	0.098664	0.24995	-11.61	0.038396	0.145076
LCL161	E.Apoptotic modulator	Antiapoptotic inhibitor	18	10	5.01667	9.02	55	0.098664	0.24995	-4	0.117188	0.269888
Navitoclax	E.Apoptotic modulator	Antiapoptotic inhibitor	18	10	42.1833	37.02	101	0.620606	0.758663	5.16	0.523348	0.710258
Obatoclax	E.Apoptotic modulator	Antiapoptotic inhibitor	18	10	15.6333	21.24	57	0.120528	0.27758	-5.61	0.244176	0.421758
Olaparib	E.Apoptotic modulator	Antiapoptotic inhibitor	18	10	1.07778	1.29	69.5	0.356195	0.541417	-0.21	0.749525	0.850208
Sepantronium	E.Apoptotic modulator	Antiapoptotic inhibitor	18	10	4.12222	11.6	37.5	0.011615	0.102602	-7.48	0.007799	0.053195
Venetoclax	E.Apoptotic modulator	Antiapoptotic inhibitor	18	10	39.9778	14.08	154	0.001398	0.03542	25.9	0.0008	0.020265	*
KW-2478	E.Apoptotic modulator	HSP90 inhibitor	18	10	4.22778	14.52	17	0.000173	0.006585	-10.29	0.0002	0.007599	**
Luminespib	E.Apoptotic modulator	HSP90 inhibitor	18	10	22.7833	42.86	39	0.0135	0.102602	-20.08	0.010599	0.061963
NVP-HSP990	E.Apoptotic modulator	HSP90 inhibitor	18	10	22.3222	44.52	32	0.004353	0.065573	-22.2	0.0044	0.053195
Onalespib	E.Apoptotic modulator	HSP90 inhibitor	18	10	20.1889	39.41	37	0.009955	0.102602	-19.22	0.006999	0.053195
PU-H71	E.Apoptotic modulator	HSP90 inhibitor	18	10	11.5556	18.95	51.5	0.071738	0.217086	-7.39	0.070193	0.220378
CAD204520	F.NOTCH1	NOTCH1 inhibitor	18	10	7.35	5.83	106	0.464182	0.653293	1.52	0.40096	0.586018
CB-103	F.NOTCH1	NOTCH1 inhibitor	18	10	0.677778	1.54	67.5	0.308478	0.52535	-0.86	0.240376	0.421758
MK-0752	F.NOTCH1	NOTCH1 inhibitor	18	10	0.511111	1.01	92.5	0.94371	0.956292	-0.5	0.59594	0.760173
RO4929097	F.NOTCH1	NOTCH1 inhibitor	18	10	0.433333	0.95	80.5	0.688786	0.758663	-0.52	0.320968	0.519012
