# Supplementary material
Source: Research Square preprint supplement (doi:10.21203/rs.3.rs-8620646/v1)
Supplement: Supplementary file 4 [file 7a99c30738d6d5abfa573209.xlsx]

## Sheet: Description
Supplementary Data 3. Results of Kruskal-Wallis H-tests on sample clusters with selected drugs.
The nonparametric Kruskal-Wallis H-test was used to test differences in median DSS across groups. Post-hoc tests were performed by Mann-Whitney U, and an FDR correction according to Benjamini-Hochberg was applied to the resulting data as a whole.
Description of sheets and columns
Sheet name:	A. Clusters KW
	Description:	Results of the Kruskal-Wallis H-test on the four identified clusters for selected compounds, performed with `scipy.stats.kruskal`.
	Columns:	Column	Column description
		Drug	Drug name
		Class	Drug class
		Group	Target/mechanism of action subgroup within class
		stat	Kruskal-Wallis H-test statistic, corrected for ties
		p_value	p-value for the test
		p_*	Visual representation of the significativity of the p-value: *<0.05, **<0.01, ***<0.001.
Sheet name:	B. Clusters MWU post-hoc
	Description:	Results of the post-hoc Mann-Whitney U test performed on drugs with significant p-value (Kruskal-Wallis P < 0.05), with adjustment for multiple hypothesis testing according to the Benjamini-Hochberg procedure.
	Columns:	Column	Column description
		Comparison	Clusters being compared
		Drug	Drug name
		Class	Drug class
		Group	Target/mechanism of action subgroup within class
		n1	Number of samples in group 1 (first cluster of the comparison)
		n2	Number of samples in group 2 (second cluster of the comparison)
		n1_mean	Mean of group 1
		n2_mean	Mean of group 2
		U	Mann-Whitney U-test statistic
		p	Mann-Whitney U-test p-value
		FDR	p-value adjusted according to the Benjamini-Hochberg procedure
		fdr_sig_*	Visual representation of the significativity of the FDR value: *<0.05, **<0.01, ***<0.001.

## Sheet: A. Clusters KW
Drug	Class	Group	stat	p_value	p_*
Venetoclax	E.Apoptotic modulator	Antiapoptotic inhibitor	19.5231	0.000213	***
Dinaciclib	B.Kinase inhibitor	CDK inhibitor	10.1964	0.016968	*
Dexamethasone	A.Conv.Chemo	Glucocorticoid	12.6415	0.00548	**
AR-42	D.Differentiating.epigenetic modifier	HDAC inhibitor	9.58869	0.022406	*
Givinostat	D.Differentiating.epigenetic modifier	HDAC inhibitor	13.0311	0.00457	**
NVP-HSP990	E.Apoptotic modulator	HSP90 inhibitor	8.57457	0.035516	*
Luminespib	E.Apoptotic modulator	HSP90 inhibitor	13.6179	0.003474	**
Onalespib	E.Apoptotic modulator	HSP90 inhibitor	13.6009	0.003502	**
Dasatinib	B.Kinase inhibitor	Kinase inhibitor	12.5313	0.005768	**
Mitoxantrone	A.Conv.Chemo	Topoisomerase inhibitor	15.5085	0.00143	**
Daunorubicin	A.Conv.Chemo	Topoisomerase inhibitor	14.1838	0.002665	**

## Sheet: B. Clusters MWU post-hoc
Clusters	Drug	Class	Group	n1	n2	n1_mean	n2_mean	U	p	FDR	fdr_sig_*
I1 - T	AR-42	D.Differentiating.epigenetic modifier	HDAC inhibitor	9	7	18.7333	30.3857	16	0.114161	0.188365
I1 - I2	AR-42	D.Differentiating.epigenetic modifier	HDAC inhibitor	9	5	18.7333	38.1	5	0.018981	0.052198
I1 - H	AR-42	D.Differentiating.epigenetic modifier	HDAC inhibitor	9	7	18.7333	17.2143	30	0.918182	0.977419
T - I2	AR-42	D.Differentiating.epigenetic modifier	HDAC inhibitor	7	5	30.3857	38.1	11	0.343434	0.472222
T - H	AR-42	D.Differentiating.epigenetic modifier	HDAC inhibitor	7	7	30.3857	17.2143	38	0.097319	0.173597
I2 - H	AR-42	D.Differentiating.epigenetic modifier	HDAC inhibitor	5	7	38.1	17.2143	34	0.005051	0.019231	*
I1 - T	Dasatinib	B.Kinase inhibitor	Kinase inhibitor	9	7	4.53333	38.6429	5	0.003322	0.015659	*
I1 - I2	Dasatinib	B.Kinase inhibitor	Kinase inhibitor	9	5	4.53333	4.72	18	0.606394	0.741148
I1 - H	Dasatinib	B.Kinase inhibitor	Kinase inhibitor	9	7	4.53333	23.6	11.5	0.041783	0.088958
T - I2	Dasatinib	B.Kinase inhibitor	Kinase inhibitor	7	5	38.6429	4.72	33	0.010101	0.031746	*
T - H	Dasatinib	B.Kinase inhibitor	Kinase inhibitor	7	7	38.6429	23.6	36	0.164918	0.253131
I2 - H	Dasatinib	B.Kinase inhibitor	Kinase inhibitor	5	7	4.72	23.6	8	0.14899	0.234127
I1 - T	Daunorubicin	A.Conv.Chemo	Topoisomerase inhibitor	9	7	9.3	34.4714	11	0.031119	0.068462
I1 - I2	Daunorubicin	A.Conv.Chemo	Topoisomerase inhibitor	9	5	9.3	33.92	6	0.028971	0.065934
I1 - H	Daunorubicin	A.Conv.Chemo	Topoisomerase inhibitor	9	7	9.3	6.17143	47	0.114161	0.188365
T - I2	Daunorubicin	A.Conv.Chemo	Topoisomerase inhibitor	7	5	34.4714	33.92	17	1	1
T - H	Daunorubicin	A.Conv.Chemo	Topoisomerase inhibitor	7	7	34.4714	6.17143	46	0.004079	0.017949	*
I2 - H	Daunorubicin	A.Conv.Chemo	Topoisomerase inhibitor	5	7	33.92	6.17143	35	0.002525	0.013889	*
I1 - T	Dexamethasone	A.Conv.Chemo	Glucocorticoid	9	7	22.5333	45	13	0.054895	0.113221
I1 - I2	Dexamethasone	A.Conv.Chemo	Glucocorticoid	9	5	22.5333	4.16	37	0.05994	0.11988
I1 - H	Dexamethasone	A.Conv.Chemo	Glucocorticoid	9	7	22.5333	9.52857	42	0.299126	0.438718
T - I2	Dexamethasone	A.Conv.Chemo	Glucocorticoid	7	5	45	4.16	35	0.002525	0.013889	*
T - H	Dexamethasone	A.Conv.Chemo	Glucocorticoid	7	7	45	9.52857	45	0.006993	0.023077	*
I2 - H	Dexamethasone	A.Conv.Chemo	Glucocorticoid	5	7	4.16	9.52857	10.5	0.343434	0.472222
I1 - T	Dinaciclib	B.Kinase inhibitor	CDK inhibitor	9	7	39.1778	57.9	15	0.090734	0.166346
I1 - I2	Dinaciclib	B.Kinase inhibitor	CDK inhibitor	9	5	39.1778	74.14	0	0.000999	0.009419	**
I1 - H	Dinaciclib	B.Kinase inhibitor	CDK inhibitor	9	7	39.1778	55.2571	14	0.071154	0.138122
T - I2	Dinaciclib	B.Kinase inhibitor	CDK inhibitor	7	5	57.9	74.14	11	0.343434	0.472222
T - H	Dinaciclib	B.Kinase inhibitor	CDK inhibitor	7	7	57.9	55.2571	26	0.901515	0.97541
I2 - H	Dinaciclib	B.Kinase inhibitor	CDK inhibitor	5	7	74.14	55.2571	28	0.106061	0.184211
I1 - T	Givinostat	D.Differentiating.epigenetic modifier	HDAC inhibitor	9	7	19.2444	46.4429	8	0.011538	0.034615	*
I1 - I2	Givinostat	D.Differentiating.epigenetic modifier	HDAC inhibitor	9	5	19.2444	48.66	3	0.006993	0.023077	*
I1 - H	Givinostat	D.Differentiating.epigenetic modifier	HDAC inhibitor	9	7	19.2444	22.1286	24	0.469755	0.596228
T - I2	Givinostat	D.Differentiating.epigenetic modifier	HDAC inhibitor	7	5	46.4429	48.66	18	1	1
T - H	Givinostat	D.Differentiating.epigenetic modifier	HDAC inhibitor	7	7	46.4429	22.1286	42	0.026224	0.064103
I2 - H	Givinostat	D.Differentiating.epigenetic modifier	HDAC inhibitor	5	7	48.66	22.1286	34	0.005051	0.019231	*
I1 - T	Luminespib	E.Apoptotic modulator	HSP90 inhibitor	9	7	10.6111	33.3714	15	0.090734	0.166346
I1 - I2	Luminespib	E.Apoptotic modulator	HSP90 inhibitor	9	5	10.6111	41.04	0	0.000999	0.009419	**
I1 - H	Luminespib	E.Apoptotic modulator	HSP90 inhibitor	9	7	10.6111	43.4857	0	0.000175	0.005769	**
T - I2	Luminespib	E.Apoptotic modulator	HSP90 inhibitor	7	5	33.3714	41.04	13	0.530303	0.660377
T - H	Luminespib	E.Apoptotic modulator	HSP90 inhibitor	7	7	33.3714	43.4857	17	0.382867	0.505385
I2 - H	Luminespib	E.Apoptotic modulator	HSP90 inhibitor	5	7	41.04	43.4857	15	0.755051	0.859195
I1 - T	Mitoxantrone	A.Conv.Chemo	Topoisomerase inhibitor	9	7	57.2889	63.0571	22	0.351049	0.472841
I1 - I2	Mitoxantrone	A.Conv.Chemo	Topoisomerase inhibitor	9	5	57.2889	64.68	11	0.146853	0.234127
I1 - H	Mitoxantrone	A.Conv.Chemo	Topoisomerase inhibitor	9	7	57.2889	36.1286	61	0.000699	0.009419	**
T - I2	Mitoxantrone	A.Conv.Chemo	Topoisomerase inhibitor	7	5	63.0571	64.68	15	0.755051	0.859195
T - H	Mitoxantrone	A.Conv.Chemo	Topoisomerase inhibitor	7	7	63.0571	36.1286	48	0.001166	0.009615	**
I2 - H	Mitoxantrone	A.Conv.Chemo	Topoisomerase inhibitor	5	7	64.68	36.1286	35	0.002525	0.013889	*
I1 - T	NVP-HSP990	E.Apoptotic modulator	HSP90 inhibitor	9	7	14.1667	38.5286	10	0.022902	0.058136
I1 - I2	NVP-HSP990	E.Apoptotic modulator	HSP90 inhibitor	9	5	14.1667	36.3	6	0.028971	0.065934
I1 - H	NVP-HSP990	E.Apoptotic modulator	HSP90 inhibitor	9	7	14.1667	38.3286	10	0.022902	0.058136
T - I2	NVP-HSP990	E.Apoptotic modulator	HSP90 inhibitor	7	5	38.5286	36.3	18	1	1
T - H	NVP-HSP990	E.Apoptotic modulator	HSP90 inhibitor	7	7	38.5286	38.3286	25	1	1
I2 - H	NVP-HSP990	E.Apoptotic modulator	HSP90 inhibitor	5	7	36.3	38.3286	16	0.876263	0.963889
I1 - T	Onalespib	E.Apoptotic modulator	HSP90 inhibitor	9	7	9.87778	37.8	5	0.003322	0.015659	*
I1 - I2	Onalespib	E.Apoptotic modulator	HSP90 inhibitor	9	5	9.87778	34.18	0	0.000999	0.009419	**
I1 - H	Onalespib	E.Apoptotic modulator	HSP90 inhibitor	9	7	9.87778	33.3	6	0.005245	0.019231	*
T - I2	Onalespib	E.Apoptotic modulator	HSP90 inhibitor	7	5	37.8	34.18	20	0.755051	0.859195
T - H	Onalespib	E.Apoptotic modulator	HSP90 inhibitor	7	7	37.8	33.3	28	0.710373	0.852448
I2 - H	Onalespib	E.Apoptotic modulator	HSP90 inhibitor	5	7	34.18	33.3	19	0.876263	0.963889
I1 - T	Venetoclax	E.Apoptotic modulator	Antiapoptotic inhibitor	9	7	52.7222	16.0714	62	0.00035	0.007692	**
I1 - I2	Venetoclax	E.Apoptotic modulator	Antiapoptotic inhibitor	9	5	52.7222	39.4	32	0.23976	0.35964
I1 - H	Venetoclax	E.Apoptotic modulator	Antiapoptotic inhibitor	9	7	52.7222	10.9143	63	0.000175	0.005769	**
T - I2	Venetoclax	E.Apoptotic modulator	Antiapoptotic inhibitor	7	5	16.0714	39.4	3	0.017677	0.050725
T - H	Venetoclax	E.Apoptotic modulator	Antiapoptotic inhibitor	7	7	16.0714	10.9143	31	0.455711	0.589744
I2 - H	Venetoclax	E.Apoptotic modulator	Antiapoptotic inhibitor	5	7	39.4	10.9143	35	0.002525	0.013889	*
