# Supplementary material
Source: Research Square preprint supplement (doi:10.21203/rs.3.rs-8620646/v1)
Supplement: Supplementary file 5 [file abaf22c74535fa7455b42942.xlsx]

## Sheet: Description
Supplementary Data 6. Results of tests on FBXW7-positive versus FBXW7-negative groups.
This spreadsheet reports results for several tests performed to assess the association of FBXW7 genotype to the cohort's drug sensitivity profile. Analyses include Mann-Whitney U and permutation tests on all drugs, Kruskal-Wallis H tests on kinase inhibitors, post-hoc Mann-Whitney U tests and Freedman-Lane permutation ANOVA on an additive linear model for Dasatinib sensitivity.
Description of sheets and columns
Sheet name:	A. MWU and permutation full
	Description:	Results of the Mann-Whitney U and permutation tests for all drugs, performed on the groups FBXW7-wild type (22 cases) versus FBXW7-altered (5 cases), with adjustment for multiple hypotheses testing (Benjamini-Hochberg).
	Columns:	Column	Column description
		Drug	Drug name
		Class	Drug class
		Group	Target/mechanism of action subgroup within class
		n1	Number of samples in group 1 (FBXW7-wild type)
		n2	Number of samples in group 2 (FBXW7-altered)
		n1_mean	Mean DSS of group 1 (FBXW7-wild type)
		n2_mean	Mean DSS of group 2 (FBXW7-altered)
		U	Mann-Whitney U-test statistic
		p	Mann-Whitney U-test p-value
		fdr	p-value of the Mann-Whitney U test, adjusted according to the Benjamini-Hochberg procedure
		perm_stat	permutation test statistic
		perm_p	permutation test p-value
		perm_fdr	permutation test p-value, adjusted according to the Benjamini-Hochberg procedure
		perm_fdr_sig_*	Visual representation of the significativity of the permutation test FDR value: *<0.05, **<0.01, ***<0.001.
Sheet name:	B. Kruskal-Wallis H test on KI
	Description:	Results of the Kruskal-Wallis H-test on the three groups: NOTCH1-wt (9 cases), NOTCH1-alt + FBXW7-wt (13 cases) and FBXW7-alt (5 cases), performed on all drugs of the "Kinase Inhibitor" class that showed permutation test FDR < 0.05.
	Columns:	Column	Column description
		Drug	Drug name
		Class	Drug class
		Group	Target/mechanism of action subgroup within class
		stat	Kruskal-Wallis H-test statistic, corrected for ties
		p_value	p-value for the test
		p_sig_*	Visual representation of the significativity of the p-value: *<0.05, **<0.01, ***<0.001.
Sheet name:	C. post-hoc Mann-Whitney U test
	Description:	Results of the post-hoc Mann-Whitney U test performed on drugs with significant p-value (Kruskal-Wallis P < 0.05), with adjustment for multiple hypothesis testing according to the Benjamini-Hochberg procedure.
	Columns:	Column	Column description
		Comparison	Clusters being compared
		Drug	Drug name
		Class	Drug class
		Group	Target/mechanism of action subgroup within class
		n1	Number of samples in group 1 (first group mentioned in column "Comparison")
		n2	Number of samples in group 2 (second group mentioned in column "Comparison")
		n1_mean	Mean of group 1
		n2_mean	Mean of group 2
		U	Mann-Whitney U-test statistic
		p	Mann-Whitney U-test p-value
		FDR	p-value adjusted according to the Benjamini-Hochberg procedure
		fdr_sig_*	Visual representation of the significativity of the FDR value: *<0.05, **<0.01, ***<0.001.
Sheet name:	D. permutation test ANOVA
	Description:	Results of the additive linear model (DSS ~ GeneGroup + Phenotype) analyzed by Freedman–Lane permutation ANOVA, used to assess the independent effects of NOTCH1/FBXW7 genotype and tumor phenotype on sample sensitivity to Dasatinib.
	Sections:	Section	Section description
		Anova Table	Results of the permutation-based ANOVA (aovperm output)
		Adjusted means (GeneGroup)	Estimated marginal means (EMMs) of DSS for each GeneGroup level, adjusted for Phenotype
		Adjusted means (Phenotype)	Estimated marginal means (EMMs) of DSS for each Phenotype level, adjusted for GeneGroup
		Pairwise (GeneGroup; Tukey)	Pairwise comparisons between adjusted mean DSS of each GeneGroup, using Tukey’s correction
		Pairwise (Phenotype; Tukey)	Pairwise comparison between the two Phenotype groups (Immature vs Typical) based on adjusted mean DSS
	Columns:	Column	Column description
		GeneGroup	Sample group according to genotype, either NOTCH1wt, NOTCH1alt (but FBCW7-wt), or FBXW7alt
		Phenotype	Sample group according to phenotype, either Immature or Typical
		emmean	Estimated marginal mean (adjusted mean DSS) predicted by the model for that group
		SE	Standard error
		df	Degrees of freedom
		lower.CL	Lower bound of the 95% confidence interval for the adjusted mean
		upper.CL	Upper bound of the 95% confidence interval for the adjusted mean
		contrast	Pair of group levels being compared
		estimate	Difference in adjusted means between the two contrasted groups
		t.ratio	t-statistic for the pairwise comparison of adjusted means
		p.value	p-value for the contrast (adjusted by Tukey correction for multiple comparisons when applicable).

## Sheet: A. MWU and permutation full
Drug	Class	Group	n1	n2	n1_mean	n2_mean	U	p	fdr	perm_stat	perm_p	perm_fdr	perm_fdr_sig_*
Actinomycin D	A.Conv.Chemo	Antibiotic	22	5	14.8864	38.86	16	0.01261	0.068454	-23.97	0.008999	0.045595	*
Dexamethasone	A.Conv.Chemo	Glucocorticoid	22	5	16.45	48.66	19	0.023114	0.092456	-32.21	0.006799	0.045595	*
Docetaxel	A.Conv.Chemo	Microtubule depolymerization inhibitor	22	5	5.22727	19.4	30	0.129246	0.218282	-14.17	0.030197	0.088268
Vincristine	A.Conv.Chemo	Microtubule depolymerization inhibitor	22	5	8.88636	31.78	9	0.002056	0.068454	-22.89	0.0034	0.045595	*
6-Mercaptopurine	A.Conv.Chemo	Nucleoside analog	22	5	0.059091	0.48	39	0.344333	0.451195	-0.42	0.071393	0.142786
6-Thioguanine	A.Conv.Chemo	Nucleoside analog	22	5	2.80455	5.16	31.5	0.165292	0.256371	-2.36	0.171183	0.25019
Cytarabine	A.Conv.Chemo	Nucleoside analog	22	5	6.88636	18.76	27.5	0.09922	0.21563	-11.87	0.071193	0.142786
Fludarabine	A.Conv.Chemo	Nucleoside analog	22	5	15.9864	12.52	66	0.523919	0.553026	3.47	0.520148	0.572917
Gemcitabine	A.Conv.Chemo	Nucleoside analog	22	5	4.15909	17.18	24	0.055048	0.149415	-13.02	0.045395	0.118967
Methotrexate	A.Conv.Chemo	Nucleoside analog	22	5	0.059091	0	60	0.785582	0.806814	0.06	1	1
Nelarabine	A.Conv.Chemo	Nucleoside analog	22	5	2.82727	7.22	25	0.064288	0.162864	-4.39	0.055994	0.128957
Pentostatin	A.Conv.Chemo	Nucleoside analog	22	5	1.2	0.44	44	0.523919	0.553026	0.76	0.446355	0.498868
Daunorubicin	A.Conv.Chemo	Topoisomerase inhibitor	22	5	16.0455	35.26	37	0.284454	0.393064	-19.21	0.070193	0.142786
Doxorubicin	A.Conv.Chemo	Topoisomerase inhibitor	22	5	6.16364	10.22	29	0.113489	0.21563	-4.06	0.163584	0.243772
Epirubicin	A.Conv.Chemo	Topoisomerase inhibitor	22	5	8.20454	15.22	28.5	0.113489	0.21563	-7.02	0.10499	0.185563
Etoposide	A.Conv.Chemo	Topoisomerase inhibitor	22	5	3.63636	6.78	38	0.313539	0.418052	-3.14	0.162384	0.243772
Idarubicin	A.Conv.Chemo	Topoisomerase inhibitor	22	5	14.6364	30.48	33	0.185705	0.271416	-15.84	0.10339	0.185563
Mitoxantrone	A.Conv.Chemo	Topoisomerase inhibitor	22	5	55.2455	55.82	52	0.879945	0.891678	-0.57	0.960304	0.986258
Topotecan	A.Conv.Chemo	Topoisomerase inhibitor	22	5	9.75455	33.32	15	0.010108	0.068454	-23.57	0.006999	0.045595	*
Dinaciclib	B.Kinase inhibitor	CDK inhibitor	22	5	50.9409	70.16	25	0.064288	0.162864	-19.22	0.050995	0.12502
Palbociclib	B.Kinase inhibitor	CDK inhibitor	22	5	4.61818	5.16	43.5	0.523919	0.553026	-0.54	0.574743	0.615217
SNS-032	B.Kinase inhibitor	CDK inhibitor	22	5	25.0364	45.16	29	0.113489	0.21563	-20.12	0.059594	0.13321
Afatinib	B.Kinase inhibitor	Kinase inhibitor	22	5	7.50909	11.04	30	0.129246	0.218282	-3.53	0.114389	0.19758
Alisertib	B.Kinase inhibitor	Kinase inhibitor	22	5	1.17727	9.04	19	0.023114	0.092456	-7.86	0.005799	0.045595	*
AT9283	B.Kinase inhibitor	Kinase inhibitor	22	5	4.85	26.38	18.5	0.023114	0.092456	-21.53	0.008399	0.045595	*
Barasertib-HQPA	B.Kinase inhibitor	Kinase inhibitor	22	5	1.03182	12.9	23	0.046848	0.142416	-11.87	0.007799	0.045595	*
BI 2536	B.Kinase inhibitor	Kinase inhibitor	22	5	14.8818	34.34	12	0.00488	0.068454	-19.46	0.0024	0.045595	*
Cabozantinib	B.Kinase inhibitor	Kinase inhibitor	22	5	2.52273	4.66	35	0.231612	0.332122	-2.14	0.189781	0.272139
Cerdulatinib	B.Kinase inhibitor	Kinase inhibitor	22	5	4.48636	22.54	13.5	0.008027	0.068454	-18.05	0.0018	0.045595	*
Crenolanib	B.Kinase inhibitor	Kinase inhibitor	22	5	5.47727	13.42	15	0.010108	0.068454	-7.94	0.026597	0.084225
Crizotinib	B.Kinase inhibitor	Kinase inhibitor	22	5	4.78636	9.92	21	0.033346	0.110186	-5.13	0.008799	0.045595	*
Dasatinib	B.Kinase inhibitor	Kinase inhibitor	22	5	10.6182	44.64	11.5	0.00488	0.068454	-34.02	0.0022	0.045595	*
Dovitinib	B.Kinase inhibitor	Kinase inhibitor	22	5	10.0727	13.2	27.5	0.09922	0.21563	-3.13	0.391361	0.459696
Entospletinib	B.Kinase inhibitor	Kinase inhibitor	22	5	2.59091	4.92	16	0.01261	0.068454	-2.33	0.337566	0.413791
Fostamatinib	B.Kinase inhibitor	Kinase inhibitor	22	5	3.71818	4.82	43.5	0.523919	0.553026	-1.1	0.69853	0.737337
Imatinib	B.Kinase inhibitor	Kinase inhibitor	22	5	0.472727	4.2	11.5	0.00488	0.068454	-3.73	0.023998	0.079296
INCB053914	B.Kinase inhibitor	Kinase inhibitor	22	5	5.07727	11.58	16	0.01261	0.068454	-6.5	0.012399	0.057218
Infigratinib	B.Kinase inhibitor	Kinase inhibitor	22	5	2.3	3.78	30.5	0.146464	0.231901	-1.48	0.277972	0.364239
Lestaurtinib	B.Kinase inhibitor	Kinase inhibitor	22	5	4.42273	9.12	38	0.313539	0.418052	-4.7	0.314569	0.405207
Midostaurin	B.Kinase inhibitor	Kinase inhibitor	22	5	5.90909	3.4	42	0.447194	0.514951	2.51	1	1
Nilotinib	B.Kinase inhibitor	Kinase inhibitor	22	5	1.76364	8.94	41	0.411198	0.496048	-7.18	0.131787	0.220863
RAF265	B.Kinase inhibitor	Kinase inhibitor	22	5	8.25455	11.2	41	0.411198	0.496048	-2.95	0.322568	0.408586
Ruxolitinib	B.Kinase inhibitor	Kinase inhibitor	22	5	1.77273	5.8	32.5	0.185705	0.271416	-4.03	0.136586	0.220863
Sunitinib	B.Kinase inhibitor	Kinase inhibitor	22	5	5.79545	12.86	16.5	0.015558	0.078827	-7.06	0.019798	0.075232
TAK-659	B.Kinase inhibitor	Kinase inhibitor	22	5	3.13182	12.76	30	0.129246	0.218282	-9.63	0.029597	0.088268
Tirbanibulin	B.Kinase inhibitor	Kinase inhibitor	22	5	9.22273	29.74	15	0.010108	0.068454	-20.52	0.0032	0.045595	*
TP-3654	B.Kinase inhibitor	Kinase inhibitor	22	5	5	8.48	29.5	0.129246	0.218282	-3.48	0.232377	0.315368
XL228	B.Kinase inhibitor	Kinase inhibitor	22	5	7.10909	19.66	23.5	0.055048	0.149415	-12.55	0.012799	0.057218
AZD-8055	B.Kinase inhibitor	PI3K/mTOR/AKT inhibitor	22	5	8.80909	27.38	29	0.113489	0.21563	-18.57	0.022398	0.077374
Buparlisib	B.Kinase inhibitor	PI3K/mTOR/AKT inhibitor	22	5	2.68636	11.44	15.5	0.01261	0.068454	-8.75	0.0046	0.045595	*
Dactolisib	B.Kinase inhibitor	PI3K/mTOR/AKT inhibitor	22	5	5.25455	15.48	29.5	0.129246	0.218282	-10.23	0.136386	0.220863
MK-2206	B.Kinase inhibitor	PI3K/mTOR/AKT inhibitor	22	5	8.91818	20.4	29	0.113489	0.21563	-11.48	0.092391	0.171261
Rapamycin	B.Kinase inhibitor	PI3K/mTOR/AKT inhibitor	22	5	9.73182	16.18	42	0.447194	0.514951	-6.45	0.267973	0.357298
Temsirolimus	B.Kinase inhibitor	PI3K/mTOR/AKT inhibitor	22	5	7.33636	16.26	30.5	0.146464	0.231901	-8.92	0.066193	0.142786
Umbralisib	B.Kinase inhibitor	PI3K/mTOR/AKT inhibitor	22	5	1.44545	4.98	27.5	0.09922	0.21563	-3.53	0.055194	0.128957
Bortezomib	C.Protease.proteasome inhibitor	Proteasome inhibitor	22	5	9.44091	13.02	41.5	0.447194	0.514951	-3.58	0.332567	0.413791
BMS-986158	D.Differentiating.epigenetic modifier	BET inhibitor	22	5	21.7545	41.88	18	0.019051	0.090493	-20.13	0.038596	0.104761
AR-42	D.Differentiating.epigenetic modifier	HDAC inhibitor	22	5	23.9591	30.14	41	0.411198	0.496048	-6.18	0.372163	0.448958
Entinostat	D.Differentiating.epigenetic modifier	HDAC inhibitor	22	5	12.3864	28.52	11	0.003716	0.068454	-16.13	0.0038	0.045595	*
Givinostat	D.Differentiating.epigenetic modifier	HDAC inhibitor	22	5	27.8227	52.5	21	0.033346	0.110186	-24.68	0.016798	0.070393
Panobinostat	D.Differentiating.epigenetic modifier	HDAC inhibitor	22	5	27.7545	41.74	19.5	0.027871	0.105909	-13.99	0.050795	0.12502
LCL161	E.Apoptotic modulator	Antiapoptotic inhibitor	22	5	5.77727	9.76	40.5	0.411198	0.496048	-3.98	0.231977	0.315368
Navitoclax	E.Apoptotic modulator	Antiapoptotic inhibitor	22	5	39.1364	52.72	33	0.185705	0.271416	-13.58	0.150185	0.23294
Obatoclax	E.Apoptotic modulator	Antiapoptotic inhibitor	22	5	14.8409	31.76	14	0.008027	0.068454	-16.92	0.008799	0.045595	*
Olaparib	E.Apoptotic modulator	Antiapoptotic inhibitor	22	5	0.959091	2.24	21	0.033346	0.110186	-1.28	0.209979	0.295526
Sepantronium	E.Apoptotic modulator	Antiapoptotic inhibitor	22	5	6.45909	8.52	43	0.484752	0.549868	-2.06	0.541146	0.58753
Venetoclax	E.Apoptotic modulator	Antiapoptotic inhibitor	22	5	33.5045	24.66	69	0.411198	0.496048	8.84	0.39976	0.46033
KW-2478	E.Apoptotic modulator	HSP90 inhibitor	22	5	5.94091	16.04	26	0.074693	0.183119	-10.1	0.020998	0.075992
Luminespib	E.Apoptotic modulator	HSP90 inhibitor	22	5	26.4727	45.02	30.5	0.146464	0.231901	-18.55	0.077592	0.147425
NVP-HSP990	E.Apoptotic modulator	HSP90 inhibitor	22	5	26.4136	47.8	23.5	0.055048	0.149415	-21.39	0.033797	0.095131
Onalespib	E.Apoptotic modulator	HSP90 inhibitor	22	5	23.1136	45.24	21.5	0.039663	0.1256	-22.13	0.017598	0.070393
PU-H71	E.Apoptotic modulator	HSP90 inhibitor	22	5	12.5091	22.32	28.5	0.113489	0.21563	-9.81	0.075392	0.146919
CAD204520	F.NOTCH1	NOTCH1 inhibitor	22	5	6.84546	7.14	53	0.927784	0.927784	-0.29	0.855914	0.891089
CB-103	F.NOTCH1	NOTCH1 inhibitor	22	5	0.881818	1.64	43.5	0.523919	0.553026	-0.76	0.393161	0.459696
MK-0752	F.NOTCH1	NOTCH1 inhibitor	22	5	0.413636	2.04	35.5	0.257178	0.361955	-1.63	0.142386	0.225444
RO4929097	F.NOTCH1	NOTCH1 inhibitor	22	5	0.55	1.04	49	0.739353	0.769738	-0.49	0.427157	0.484537

## Sheet: B. Kruskal-Wallis H test on KI
Drug	Class	Group	stat	p_value	p_sig_*
AT9283	B.Kinase inhibitor	Kinase inhibitor	7.54889	0.02295	*
Alisertib	B.Kinase inhibitor	Kinase inhibitor	5.77387	0.055747
BI 2536	B.Kinase inhibitor	Kinase inhibitor	8.10848	0.017349	*
Barasertib-HQPA	B.Kinase inhibitor	Kinase inhibitor	4.49694	0.105561
Buparlisib	B.Kinase inhibitor	PI3K/mTOR/AKT inhibitor	6.38073	0.041157	*
Cerdulatinib	B.Kinase inhibitor	Kinase inhibitor	7.13126	0.028279	*
Crizotinib	B.Kinase inhibitor	Kinase inhibitor	4.75783	0.092651
Dasatinib	B.Kinase inhibitor	Kinase inhibitor	7.57072	0.022701	*
Tirbanibulin	B.Kinase inhibitor	Kinase inhibitor	8.19536	0.016611	*

## Sheet: C. post-hoc Mann-Whitney U test
Comparison	Drug	Class	Group	n1	n2	n1_mean	n2_mean	U	p	FDR	fdr_sig_*
NOTCH1-wt vs NOTCH1-alt	AT9283	B.Kinase inhibitor	Kinase inhibitor	9	13	3.34444	5.89231	33.5	0.110181	0.152558
NOTCH1-wt vs NOTCH1-alt	BI 2536	B.Kinase inhibitor	Kinase inhibitor	9	13	11.8444	16.9846	44	0.357485	0.428982
NOTCH1-wt vs NOTCH1-alt	Buparlisib	B.Kinase inhibitor	PI3K/mTOR/AKT inhibitor	9	13	2.78889	2.61538	68	0.555587	0.625035
NOTCH1-wt vs NOTCH1-alt	Cerdulatinib	B.Kinase inhibitor	Kinase inhibitor	9	13	5.53333	3.76154	67	0.600527	0.635852
NOTCH1-wt vs NOTCH1-alt	Dasatinib	B.Kinase inhibitor	Kinase inhibitor	9	13	10.3556	10.8	61.5	0.896036	0.896036
NOTCH1-wt vs NOTCH1-alt	Tirbanibulin	B.Kinase inhibitor	Kinase inhibitor	9	13	6.15556	11.3462	35	0.126416	0.162535
NOTCH1-wt vs FBXW7-alt	AT9283	B.Kinase inhibitor	Kinase inhibitor	9	5	3.34444	26.38	4.5	0.018981	0.04982	*
NOTCH1-wt vs FBXW7-alt	BI 2536	B.Kinase inhibitor	Kinase inhibitor	9	5	11.8444	34.34	2	0.003996	0.04982	*
NOTCH1-wt vs FBXW7-alt	Buparlisib	B.Kinase inhibitor	PI3K/mTOR/AKT inhibitor	9	5	2.78889	11.44	6.5	0.041958	0.068659
NOTCH1-wt vs FBXW7-alt	Cerdulatinib	B.Kinase inhibitor	Kinase inhibitor	9	5	5.53333	22.54	7	0.041958	0.068659
NOTCH1-wt vs FBXW7-alt	Dasatinib	B.Kinase inhibitor	Kinase inhibitor	9	5	10.3556	44.64	2.5	0.006993	0.04982	*
NOTCH1-wt vs FBXW7-alt	Tirbanibulin	B.Kinase inhibitor	Kinase inhibitor	9	5	6.15556	29.74	4	0.011988	0.04982	*
NOTCH1-alt vs FBXW7-alt	AT9283	B.Kinase inhibitor	Kinase inhibitor	13	5	5.89231	26.38	14	0.075397	0.113095
NOTCH1-alt vs FBXW7-alt	BI 2536	B.Kinase inhibitor	Kinase inhibitor	13	5	16.9846	34.34	10	0.026377	0.059349
NOTCH1-alt vs FBXW7-alt	Buparlisib	B.Kinase inhibitor	PI3K/mTOR/AKT inhibitor	13	5	2.61538	11.44	9	0.019374	0.04982	*
NOTCH1-alt vs FBXW7-alt	Cerdulatinib	B.Kinase inhibitor	Kinase inhibitor	13	5	3.76154	22.54	6.5	0.009804	0.04982	*
NOTCH1-alt vs FBXW7-alt	Dasatinib	B.Kinase inhibitor	Kinase inhibitor	13	5	10.8	44.64	9	0.019374	0.04982	*
NOTCH1-alt vs FBXW7-alt	Tirbanibulin	B.Kinase inhibitor	Kinase inhibitor	13	5	11.3462	29.74	11	0.035014	0.068659

## Sheet: D. permutation test ANOVA
Anova Table
Factor	SS	df	F	parametric P(>F)	resampled P(>F)
GeneGroup	1640	2	3.91	0.034547	0.0333	*
Phenotype	2041	1	9.732	0.004819	0.0052	**
Residuals	4823	23
Adjusted means (GeneGroup)
GeneGroup	emmean	SE	df	lower.CL	upper.CL
FBXW7alt	38.2	6.8	23	24.16	52.3
NOTCH1alt	14.9	4.23	23	6.17	23.7
NOTCH1wt	18.7	5.51	23	7.27	30.1
Adjusted means (Phenotype)
Phenotype	emmean	SE	df	lower.CL	upper.CL
Immature	13.2	4.1	23	4.76	21.7
Typical	34.6	5.06	23	24.16	45.1
Pairwise (GeneGroup; Tukey)
contrast	estimate	SE	df	t.ratio	p.value
FBXW7alt - NOTCH1alt	23.31	8.34	23	2.796	0.0267	*
FBXW7alt - NOTCH1wt	19.55	9.36	23	2.089	0.1144
NOTCH1alt - NOTCH1wt	-3.76	6.42	23	-0.586	0.8291
Pairwise (Phenotype; Tukey)
contrast	estimate	SE	df	t.ratio	p.value
Immature - Typical	-21.4	6.86	23	-3.12	0.0048	**
