# Supplementary material
Source: Research Square preprint supplement (doi:10.21203/rs.3.rs-8620646/v1)
Supplement: Supplementary file 6 [file d645d1cc3e81545f93755057.xlsx]

## Sheet: Description
Supplementary Data 2. Variants predicted as pathogenic or likely pathogenic.
This table contains a list of all the variants detected by a custom NGS gene panel that were predicted as pathogenic or likely pathogenic.
Description of sheets and columns
Sheet name:	P-LP VARIANTS
	Description:	List of pathogenic or likely pathogenic variants.
	Columns:	Column	Column description
		Patient ID	Patient ID
		gene	Official gene symbol
		type	Variant type: SNP (nucleotide substitution) or INDEL (insertion and/or deletion)
		coding Consequence	Predicted functional consequence on the coding sequence
		chr	Chromosome number
		genome position GRCh37/hg19	Genomic start coordinate of the variant (1-based)
		ref	Reference allele sequence
		alt	Alternative allele sequence
		depth	Total sequencing depth (coverage) at the variant position
		refNum	Number of sequencing reads supporting the reference allele
		altNum	Number of sequencing reads supporting the alternative allele
		var percent	Variant allele frequency (VAF) expressed as percent of reads supporting the alternative allele
		exon_rank	Exon number within the transcript
		c.DNA	Nucleotide-level annotation according to HGVS cDNA nomenclature
		protein	Protein-level annotation according to HGVS cDNA nomenclature
		refSeq	Reference allele and its surrounding sequence context (codons affected, if any)
		altSeq	Alternative allele and its surrounding sequence context (codons affected, if any)
		refAA	Reference amino acid at the affected position, if applicable
		altAA	Alternative amino acid at the affected position, if applicable
		refSeqId	Reference sequence accession ID
		dbSNP	dbSNP reference identifier, if present
		id_cosmic_coding	COSMIC identifier for the coding variant, if present
		FINAL PREDICTION	Overall functional assessment of the variant: P = pahtogenic, LP = likely pathogenic
		NOTES	Additional annotations on tier and level of pathogenicity

## Sheet: P-LP VARIANTS
Patient ID	gene	type	coding Consequence	chr	genome position GRCh37/hg19	ref	alt	depth	refNum	altNum	var percent	exon_rank	c.DNA	protein	refSeq	altSeq	refAA	altAA	refSeqId	dbSNP	id_cosmic_coding	FINAL PREDICTION	NOTES
001-1	NOTCH1	SNP	missense	9	139391898	C	T	7697	3577	4120	52.7	34	c.6293G>A	p.(Arg2098His)	CGC	CAC	R	H	NM_017617	rs759998676	COSV53054548	LP	Uncertain/Pathogenic, Tier II, Tier I
005-1	BRAF	SNP	missense	7	140481402	C	T	2240	1255	985	43.2	11	c.1406G>A	p.(Gly469Glu)	GGA	GAA	G	E	NM_004333	rs121913355	COSV56065622	P	Pathogenic - Tier I - Tier I
005-1	SUZ12	INDEL	frameshift	17	30325820	CAATAGATA	C	2971	1802	1169	39.4	16	c.2021_2028del	p.(Ile674Serfs*7)	ATAGATAAA	AGC	IDK	S	NM_015355			LP	Likely Pathogenic - Tier III - Tier III
005-1	NOTCH1	SNP	missense	9	139399350	C	G	7654	6616	1038	12.7	26	c.4793G>C	p.(Arg1598Pro)	CGC	CCC	R	P	NM_017617		COSV53027279	LP	Uncertain/Pathogenic - Tier II - Tier III - T-ALL
005-2	KRAS	SNP	missense	12	25398284	C	T	3094	1832	1262	41.8	2	c.35G>A	p.(Gly12Asp)	GGT	GAT	G	D	NM_033360	rs121913529	COSV55497369	P	Pathogenic, Tier I, Tier I
005-2	NOTCH1	SNP	missense	9	139399344	A	T	5805	3451	2354	41.6	26	c.4799T>A	p.(Leu1600Gln)	CTG	CAG	L	Q	NM_017617		COSV53031185	LP	Uncertain/Pathogenic, Tier III, Tier I, T-ALL
005-3	ATM	SNP	synonymous	11	108151895	G	A	2965	1558	1407	48.6	24	c.3576G>A	p.(Lys1192=)	AAG	AAA	K	K	NM_000051	rs587776551	COSV105124830	P	Pathogenic, Tier I, Tier I
005-3	NOTCH1	INDEL	inframe_6	9	139390863	AC	TAGGGAGG	4678	4343	335	6.9	34	c.7327_7328delinsCCTCCCTA	p.(Val2443delinsProPro*)	GTG	CCTCCCTAG	V	PP*	NM_017617			LP	Likely Pathogenic, Tier II, Tier I
005-3	SUZ12	SNP	splice_acceptor_-2	17	30310016	A	T	2135	1981	154	7.3	9	c.918-2A>T	p.?					NM_015355			LP	Likely Pathogenic, Tier III, Tier III
005-3	GATA3	SNP	missense	10	8106004	G	A	3312	3059	253	7.2	4	c.827G>A	p.(Arg276Gln)	CGG	CAG	R	Q	NM_001002295	rs1832792205	COSV60516059	P	Pathogenic, Tier II, Tier III
005-3	JAK3	SNP	missense	19	17943438	A	G	3737	3463	274	7.7	19	c.2570T>C	p.(Leu857Pro)	CTG	CCG	L	P	NM_000215	rs768942227	COSV71685722	LP	Uncertain/Pathogenic, Tier III, Tier III - Descritta patogenica
006-2	PHF6	INDEL	frameshift	X	133547979	G	GT	2009	1012	997	49	7	c.712_713insT	p.(Ala238Valfs*4)	GCC	GTC	A	V	NM_001015877			LP	Likely pathogenic (Varsome)
006-2	EED	SNP	nonsense	11	85979574	C	T	1989	1299	690	33.8	9	c.937C>T	p.(Arg313*)	CGA	TGA	R	*	NM_003797	rs1301151502	COSV54553493	P	Likely pathogenic (Varsome), Pathogenic (Cosmic)
006-2	BCL11B	INDEL	frameshift	14	99641279	CCCCGCCG	C	1696	1148	548	32.7	4	c.1887_1893del	p.(Gly630Thrfs*91)	GGCGGCGGG	GGG	GGG	G	NM_138576			P	Pathogenic (Varsome)
006-2	NOTCH1	SNP	missense	9	139397768	A	G	2980	2019	961	32.1	27	c.5033T>C	p.(Leu1678Pro)	CTG	CCG	L	P	NM_017617		COSV53024869	P	Uncertain Significance/ Likely pathogenic-T-ALL (Varsome) Pathogenic (Cosmic)
006-2	NRAS	SNP	missense	1	115258744	C	A	2736	1952	784	28.8	2	c.38G>T	p.(Gly13Val)	GGT	GTT	G	V	NM_002524	rs121434596	COSV54736480	P	Pathogenic (Varsome) Pathogenic (Cosmic)
006-2	JAK3	SNP	missense	19	17948006	G	A	1407	996	411	27.7	13	c.1718C>T	p.(Ala573Val)	GCG	GTG	A	V	NM_000215		COSV71685401	LP	Uncertain/Pathogenic, Tier III, Tier III - Descritta patogenica
006-3	PHF6	INDEL	frameshift	X	133511739	TA	TAA	1267	106	1161	92.8	2	c.93dupA	p.(Leu32Thrfs*4)		ACT		T	NM_001015877			P	No other UPNs/Vars:P (germ?)/Cosm:-
006-3	NOTCH1	SNP	missense	9	139399389	A	G	4155	614	3541	85.7	26	c.4754T>C	p.(Leu1585Pro)	CTG	CCG	L	P	NM_017617		COSV53025649	LP	Uncertain/Pathogenic, Tier II, Tier III, T-ALL
006-3	FAT1	SNP	missense	4	187628419	C	T	3598	1965	1633	45.8	2	c.2563G>A	p.(Gly855Arg)	GGA	AGA	G	R	NM_005245	rs180820128	COSV71673147	P	No other UPNs/Vars:VUS/Cosm:P
006-3	FBXW7	SNP	missense	4	153249385	G	A	2929	1584	1345	45.2	8	c.1039C>T	p.(Arg347Cys)	CGT	TGT	R	C	NM_001013415	rs867384286	COSV55891008	P	No other UPNs/Vars:P/Cosm:P
006-3	BCL11B	INDEL	frameshift	14	99642358	TCC	CACGGCCTCG	3522	1989	1533	43.9	4	c.813_815delinsCGAGGCCGTG	p.(Ala275Glyfs*244)	CCGGAG	CCCGAGGCCGTG	PE	PEAV	NM_138576			LP	No other UPNs/Vars:LP/Cosm:-
006-3	ETV6	INDEL	splice_donor_+-1	12	11905510	CTGCGTGAG	TCCCCCTAACC	1634	1432	202	12.1	2	c.160_163+5delinsTCCCCCTAACC	p.(?)	CTG	TCC			NM_001987			LP	No other UPNs/Vars:LP/Cosm:-
006-5	CTCF	INDEL	frameshift	16	67645338	CAAAAAAA	CAAAAAAAA	3622	3378	244	6.3	3	c.610dup	p.(Thr204Asnfs*26)	ACA	AACAAAGAAAACCAAAAAGAGCAAACTGCGTTATACAGAGGAGGGCAAAGATGTAGATGTGTCTGTCTACGATTTTGA	T	NKENQKEQTALYRGGQRCRCVCLRF*	NM_006565	rs886041997	COSV50461377	P	Pathogenic, Tier III, Tier III
006-5	SUZ12	SNP	nonsense	17	30293182	C	T	2346	2225	121	5	5	c.472C>T	p.(Gln158*)	CAG	TAG	Q	*	NM_015355			LP	Likely Pathogenic, Tier III, Tier III
006-5	EZH2	SNP	missense	7	148506477	C	T	2548	2385	163	6	18	c.2035G>A	p.(Val679Met)	GTG	ATG	V	M	NM_004456	rs1321951994	COSV57447079	LP	Likely Pathogenic, Tier II, Tier I
010-1	FBXW7	SNP	missense	4	153249384	C	T	5925	1828	4097	69	8	c.1040G>A	p.(Arg347His)	CGT	CAT	R	H	NM_001013415	rs1057519895	COSV55891746	P	Likely Pathogenic (Varsome), Pathogenic (Cosmic)
010-1	JAK1	SNP	missense	1	65306941	C	T	3484	2014	1470	41.9	19	c.2636G>A	p.(Arg879His)	CGT	CAT	R	H	NM_002227		COSV100691275	P	Uncertain Significance/Pathogenic (Varsome),Pathogenic (Cosmic)
010-1	NOTCH1	INDEL	inframe_3	9	139399367	G	GCTT	4729	2750	1979	41.6	26	c.4775_4776insAAG	p.(Phe1592delinsLeuSer)	TTC	TTAAGC	F	LS	NM_017617		COSV53028189	LP	Likely Pathogenic, Tier II, Tier III
010-1	CNOT3	SNP	missense	19	54647468	C	T	3702	2178	1524	41.2	5	c.241C>T	p.(Arg81Cys)	CGC	TGC	R	C	NM_014516		COSV55360288	P	Uncertain Significance/Pathogenic (Varsome),Pathogenic (Cosmic)
010-1	JAK3	SNP	missense	19	17949108	C	T	4077	2436	1641	40.6	11	c.1533G>A	p.(Met511Ile)	ATG	ATA	M	I	NM_000215	rs752661478	COSV71685384	LP	Uncertain/Pathogenic, Tier III, Tier III - Descritta patogenica
010-2	IKZF1	INDEL	frameshift	7	50467683	G	GCC	3722	2414	1308	36	8	c.918_919insCC	p.(Lys307Profs*5)		CCA		P	NM_006060			LP	Likely Pathogenic, Tier II, Tier III
010-2	RUNX1	INDEL	frameshift	21	36252916	G	GCGGTAGCATTTCTCAGCTCC	2946	1574	1372	48.2	5	c.445_446insGGAGCTGAGAAATGCTACCG	p.(Ala149Glyfs*3)	GCA	GGGAGCTGAGAAATGCTACCG	A	GS*EMLP	NM_001754			LP	Uncertain/Pathogenic, Tier III, Tier I
010-3	FLT3	SNP	missense	13	28592641	T	A	3247	718	2529	78.3	20	c.2504A>T	p.(Asp835Val)	GAT	GTT	D	V	NM_004119	rs121909646	COSV54042199	P	Pathogenic, Tier I, Tier I
010-3	SUZ12	SNP	nonsense	17	30320326	C	T	1718	1163	555	33.4	11	c.1267C>T	p.(Arg423*)	CGA	TGA	R	*	NM_015355		COSV59503796	P	Pathogenic, Tier III, Tier I
027-1	FAT1	SNP	missense	4	187549808	A	G	2072	1481	591	29.8	8	c.4433T>C	p.(Ile1478Thr)	ATC	ACC	I	T	NM_005245	rs370782962	COSV101499283	P	No other UPN/Vars:LP/Cosm:COSV101499283,P
027-1	NOTCH1	SNP	missense	9	139399410	A	C	3002	2455	547	19.1	26	c.4733T>G	p.(Val1578Gly)	GTG	GGG	V	G	NM_017617		COSV53070403	P	No other UPN/Vars:LP/Cosm:COSV53070403,P
027-2	PTEN	INDEL	frameshift	10	89717710	GCC	GCCC	1849	1410	439	25	7	c.737dup	p.(Leu247Valfs*6)	CCG	CCC	P	P	NM_000314		COSV64288549	LP	Likely Pathogenic, Tier II, Tier I, T-ALL
027-2	PTEN	INDEL	frameshift	10	89717676	G	CCCCC	1839	1442	397	21.2	7	c.701delinsCCCCC	p.(Arg234Profs*10)	CGG	CCCCCC	R	PP	NM_000314			LP	Likely Pathogenic, Tier II, Tier I
027-2	NOTCH1	SNP	missense	9	139000000	A	T	4150	3104	1046	24.1	26	c.4787T>A	p.(Leu1596His)	CTC	CAC	L	H	NM_017617		COSV53039455	LP	Likely Pathogenic - Tier II - Tier III - T-ALL
027-2	NOTCH1	SNP	missense	9	139000000	C	G	4225	3751	474	11	27	c.5101G>C	p.(Ala1701Pro)	GCA	CCA	A	P	NM_017617		COSV53026331	LP	Uncertain/Pathogenic - Tier II - Tier III - T-ALL
027-3	EZH2	INDEL	frameshift	7	148504782	CATCAGCCTGGCTGT	G	2241	1604	637	29.9	20	c.2198_2212delinsC	p.(Tyr733Serfs*25)	TACAGCCAGGCTGATGCC	TCCCCTGAAGTATGTCGGCATCGAAAGAGAAATGGAAATCCCTTGACATCTGCTACCTCCTCCCCCCTCCTCTGA	YSQADA	SPEVCRHRKRNGNPLTSATSSPLL*	NM_004456			LP	Uncertain/Pathogenic, Tier III, Tier I
027-3	EZH2	INDEL	missense	7	148504772	TACTTC	AAAAAT	2168	1540	628	30.5	20	c.2217_2222delinsATTTTT	p.(Lys740_Tyr741delinsPhePhe)	CTGAAGTAT	CTATTTTTT	KY	FF	NM_004456			LP	Likely Pathogenic, Tier II, Tier III
027-3	JAK3	SNP	missense	19	17949108	C	T	2918	1800	1118	38	11	c.1533G>A	p.(Met511Ile)	ATG	ATA	M	I	NM_000215	rs752661478	COSV71685384	LP	Uncertain/Pathogenic, Tier III, Tier III - Descritta patogenetica
027-3	NOTCH1	SNP	missense	9	139397675	A	G	3757	2462	1295	34.3	27	c.5126T>C	p.(Leu1709Pro)	CTG	CCG	L	P	NM_017617	rs886043624	COSV53025282	LP	Uncertain, Tier II, Tier III
027-3	NOTCH1	SNP	missense	9	139390656	G	A	3216	1938	1278	38.5	34	c.7535C>T	p.(Pro2512Leu)	CCG	CTG	P	L	NM_017617	rs1160184715	COSV53028152	LP	Uncertain/Pathogenic, Tier II, Tier I
028-1	ETV6	INDEL	frameshift	12	12022568	AG	CCTCCC	4482	3703	779	18.3	5	c.674_675delinsCCTCCC	p.(Gln225Profs*20)	CAG	CCCTCCCGA	Q	PSR	NM_001987			LP	Likely Pathogenic
028-1	KRAS	SNP	missense	12	25398266	G	T	1976	1599	377	18.7	2	c.53C>A	p.(Ala18Asp)	GCC	GAC	A	D	NM_033360		COSV55580549	LP	Likely Pathogenic
028-1	RUNX1	SNP	missense	21	36252926	T	A	3504	1887	1617	47.2	5	c.436A>T	p.(Asn146Tyr)	AAT	TAT	N	Y	NM_001754	rs2057887317		LP	Likely Pathogenic
028-2	FAT3	SNP	nonsense	11	92085767	C	G	2634	1822	812	31.5	1	c.489C>G	p.(Tyr163*)	TAC	TAG	Y	*	NM_001008781			LP	Likely Pathogenic - Tier III - Tier III
028-2	IKZF1	INDEL	frameshift	7	50459448	ACAGTGAAATGG	A	3510	2377	1133	32.9	7	c.741_751del	p.(Ser247Argfs*20)	AGTGAAATGGCAGAA	AGA	SEMAE	R	NM_006060			LP	Likely Pathogenic - Tier II - Tier III
028-2	NOTCH1	SNP	missense	9	139397768	A	T	6810	5695	1115	15.3	27	c.5033T>A	p.(Leu1678Gln)	CTG	CAG	L	Q	NM_017617		COSV53029241	LP	Likely Pathogenic - Tier II - Tier II - T-ALL
028-3	KRAS	SNP	missense	12	25398284	C	A	3291	1899	1392	42.9	2	c.35G>T	p.(Gly12Val)	GGT	GTT	G	V	NM_033360	rs121913529	COSV55497419	P	Pathogenic, Tier I, Tier I
028-3	SETD2	INDEL	frameshift	3	47059129	T	TTGCGAGCCAGATGTGCCCC	2719	1281	1438	51.4	20	c.7531_7532insGGGGCACATCTGGCTCGCA	p.(Lys2511Argfs*15)	AAG	AGGGGCACATCTGGCTCGCAAGCT	K	RGTSGSQA	NM_014159			LP	Likely Pathogenic, Tier II, Tier I
028-3	NOTCH1	SNP	missense	9	139399344	A	T	6514	3904	2610	40.8	26	c.4799T>A	p.(Leu1600Gln)	CTG	CAG	L	Q	NM_017617		COSV53031185	LP	Uncertain/Pathogenic, Tier III, Tier I
033-1	FBXW7	SNP	missense	4	153249384	C	T	3183	1933	1250	38.6	8	c.1040G>A	p.(Arg347His)	CGT	CAT	R	H	NM_001013415	rs1057519895	COSV55891746	P	Pathogenic, Tier II
033-1	NOTCH1	INDEL	frameshift	9	139391020	G	GTGGTC	5026	1703	3323	66.2	34	c.7170_7171insGACCA	p.(Gln2391Aspfs*33)		GACCAC		DH	NM_017617			LP	Likely Pathogenic, Tier II, Tier II
033-1	AKT1	SNP	missense	14	105246551	C	T	3841	3448	393	10.1	3	c.49G>A	p.(Glu17Lys)	GAG	AAG	E	K	NM_005163	rs121434592	COSV62571334	P	Pathogenic, Tier II, Tier I
037-1	FBXW7	SNP	missense	4	153249384	C	T	1602	69	1533	95.7	8	c.1040G>A	p.(Arg347His)	CGT	CAT	R	H	NM_001013415	rs1057519895	COSV55891746	P	Pathogenic, Tier II
037-1	NF1	INDEL	frameshift	17	29527570	C	CAAAATAGG	1797	72	1725	95.3	9	c.1019_1020insAAAATAGG	p.(Val341Lysfs*2)	TCT	TCAAAATAGGTG	S	SK*V	NM_001042492			LP	Likely Pathogenic, Tier II, Tier I
037-1	RUNX1	INDEL	frameshift	21	36206830	GTT	GTTT	5726	2840	2886	50.3	7	c.681dup	p.(Leu228Thrfs*33)		ACT		T	NM_001754			LP	Likely Pathogenic, Tier II, Tier I
037-1	NOTCH1	SNP	missense	9	139399389	A	G	5361	2964	2397	45	26	c.4754T>C	p.(Leu1585Pro)	CTG	CCG	L	P	NM_017617		COSV53025649	LP	Uncertain/Pathogenic, Tier II, Tier III, T-ALL
038-1	NOTCH1	INDEL	frameshift	9	139391109	T	TGGTGC	6113	5325	788	12.9	34	c.7081_7082insGCACC	p.(Gln2361Argfs*4)	CAG	CGCACC	Q	RT	NM_017617			LP	Likely Pathogenic
038-1	RUNX1	INDEL	frameshift	21	36252855	T	TCTTCC	3443	3146	297	8.4	5	c.502_506dup	p.(Gly170Glufs*8)	AGA	AGGGAAGAG	R	REE	NM_001754			LP	Likely Pathogenic
038-1	SUZ12	SNP	splice_acceptor_-2	17	30315337	A	G	2319	1716	603	26.1	10	c.1024-2A>G	p.(?)					NM_015355			LP	Likely Pathogenic
038-1	WT1	INDEL	frameshift	11	32417938	GCACACGT	G	2980	2137	843	29.5	7	c.471_477del	p.(Arg158Leufs*3)	CGACGTGTG	CGC	RRV	R	NM_001198551			LP	Likely Pathogenic
038-2	NF1	SNP	splice_donor_+1	17	29527614	G	A	1420	781	639	46.7	9	c.1062+1G>A	p.(?)					NM_001042492	rs1597681200	COSV62194684	P	Pathogenic, Tier II, Tier I
038-3	FLT3	INDEL	inframe_72	13	28608241	A	AAACTCCCATTTGAGATCATATTCATATTCTCTGAAATCAACGTAGAAGTACTCATTATCTGAGGAGCCGGTC	4242	2641	1601	36.6	14	c.1743_1814dup	p.(Glu604_Phe605ins24)		TTGACCGGCTCCTCAGATAATGAGTACTTCTACGTTGATTTCAGAGAATATGAATATGATCTCAAATGGGAG		LTGSSDNEYFYVDFREYEYDLKWE	NM_004119			LP	Uncertain/Pathogenic, Tier II
038-3	FLT3	INDEL	inframe_87	13	28608228	A	AATTTTCTCTTGGAAACTCCCATTTGAGATCATATTCATATTCTCTGAAATCAACGTAGAAGTACTCATTATCTGAGGAGCCGGGTAG	4463	3171	1292	22.9	14	c.1827_1828insCTACCCGGCTCCTCAGATAATGAGTACTTCTACGTTGATTTCAGAGAATATGAATATGATCTCAAATGGGAGTTTCCAAGAGAAAAT	p.(Leu610_Glu611ins29)		CCCGGCTCCTCAGATAATGAGTACTTCTACGTTGATTTCAGAGAATATGAATATGATCTCAAATGGGAGTTTCCAAGAGAAAATTTA		PGSSDNEYFYVDFREYEYDLKWEFPRENL	NM_004119			LP	Uncertain/Pathogenic, Tier II
038-3	RUNX1	INDEL	inframe_6	21	36252865	C	CGACCAG	4233	3845	388	9.4	5	c.496_497insCTGGTC	p.(Gly165_Arg166insProGly)		CCTGGT		PG	NM_001754			P	Pathogenic, Tier II, Tier I,
042-1	IKZF1	INDEL	frameshift	7	50467976	A	AGCCTGAT	4234	2696	1538	37	8	c.1211_1212insGCCTGAT	p.(Asn404Lysfs*87)	AAC	AAGCCTGAT	N	KPD	NM_006060			LP	Likely Pathogenic (Varsome)
042-1	NRAS	SNP	missense	1	115258744	C	T	3564	2343	1221	33.9	2	c.38G>A	p.(Gly13Asp)	GGT	GAT	G	D	NM_002524	rs121434596	COSV54736416	P	Pathogenic (Varsome), Pathogenic (Cosmic)
042-1	NOTCH1	SNP	missense	9	139397774	A	T	4409	3297	1112	24.7	27	c.5027T>A	p.(Val1676Asp)	GTC	GAC	V	D	NM_017617	COSV53026269		LP	Uncertain/Pathogenic, Tier II, Tier III
042-1	NOTCH1	INDEL	inframe_3	9	139399292	G	GCCT	4400	4022	378	9.1	26	c.4850_4851insAGG	p.(Phe1617delinsLeuGly)	TTC	TTAGGC	F	LG	NM_017617			LP	Uncertain/Pathogenic, Tier II, Tier III
042-2	NF1	INDEL	frameshift	17	29677261	T	TGCGA	2336	2217	119	5.1	50	c.7382_7383insGCGA	p.(Leu2462Argfs*5)	CTT	CTGCGA	L	LR	NM_001042492			LP	Likely Pathogenic, Tier II, Tier I
042-2	PHF6	INDEL	frameshift	X	133549124	C	GAGGGGCTCCCT	1524	1376	148	9.8	8	c.808delinsGAGGGGCTCCCT	p.(Gln270Glufs*13)	CAG	GAGGGGCTCCCT	Q	EGLP	NM_001015877			P	Pathogenic
042-2	RUNX1	INDEL	frameshift	21	36259275	C	CGGGA	2855	2635	220	7.5	4	c.215_216insTCCC	p.(Arg72Serfs*67)	AGG	AGTCCC	R	SP	NM_001754			P	Pathogenic
051-1	EZH2	SNP	missense	7	148507478	C	T	1402	598	804	57.3	17	c.1976G>A	p.(Arg659Lys)	AGA	AAA	R	K	NM_004456		COSV57453273	P	No other UPNs/Vars:LP/Cosm:COSV57453273,P
051-1	EZH2	SNP	missense	7	148511172	G	A	1806	831	975	53.8	15	c.1730C>T	p.(Pro577Leu)	CCG	CTG	P	L	NM_004456	rs1554486390	COSV57449917	P	No other UPNs/Vars:LP/Cosm:COSV57449917,P
051-1	PHF6	INDEL	frameshift	X	133527594	ACATAC	GGGAA	2396	1465	931	38.3	4	c.304_309delinsGGGAA	p.(Thr102Glyfs*41)	ACATAC	GGGAAC	TY	GN	NM_001015877			P	No other UPNs/Vars:P (germ?)/Cosm:-
051-1	NOTCH1	SNP	missense	9	139399458	G	A	3276	2054	1222	37.4	26	c.4685C>T	p.(Ala1562Val)	GCG	GTG	A	V	NM_017617	rs752839680		P	No other UPNs/Vars:VUS (in healthy?)/Cosm:COSV105840259,P
051-1	NOTCH1	SNP	missense	9	139399365	A	G	2855	1775	1080	36.9	26	c.4778T>C	p.(Leu1593Pro)	CTG	CCG	L	P	NM_017617		COSV53024711	P	+ 1 other UPNs/Vars:LP, T-ALL/Cosm:COSV53024711,P
051-1	ETV6	INDEL	frameshift	12	11905483	GAAGACTCGATCCGCCT	C	1269	989	280	21.7	2	c.133_149delinsC	p.(Glu45Argfs*17)	GAAGACTCGATCCGCCTG	CGC	EDSIRL	R	NM_001987			LP	No other UPNs/Vars:LP/Cosm:-
051-2	TP53	SNP	missense	17	7578442	T	C	2552	79	2473	96.7	5	c.488A>G	p.(Tyr163Cys)	TAC	TGC	Y	C	NM_000546	rs148924904	COSV52663142	P	Pathogenic (Varsome)
051-2	NOTCH1	INDEL	inframe_6	9	139399402	G	GGGGGAA	4729	2431	2298	50	26	c.4740_4741insTTCCCC	p.(Met1580_Pro1581insPhePro)		TTCCCC		FP	NM_017617			LP	Uncertain/Pathogenic, Tier II, Tier III
051-2	FBXW7	SNP	missense	4	153249385	G	A	3506	1809	1697	49.8	8	c.1039C>T	p.(Arg347Cys)	CGT	TGT	R	C	NM_001013415	rs867384286	COSV55891008	LP	Likely Pathogenic (Varsome)
051-2	NRAS	SNP	missense	1	115258747	C	T	3917	1940	1977	49.6	2	c.35G>A	p.(Gly12Asp)	GGT	GAT	G	D	NM_002524	rs121913237	COSV54736383	P	Pathogenic (Varsome)
051-4	RUNX1	SNP	missense	21	36252928	C	G	3604	2298	1306	35	5	c.434G>C	p.(Arg145Thr)	AGA	ACA	R	T	NM_001754		COSV55891870	LP	Likely Pathogenic
055-1	FAT1	SNP	missense	4	187630753	C	T	4374	2186	2188	50.6	2	c.229G>A	p.(Gly77Arg)	GGA	AGA	G	R	NM_005245	rs377496399	COSV71676111	P	Uncertain Significance/ Likely pathogenic (Varsome),Pathogenic (Cosmic)
067-1	NRAS	SNP	missense	1	115258744	C	A	4465	4170	295	6.4	2	c.38G>T	p.(Gly13Val)	GGT	GTT	G	V	NM_002524	rs121434596	COSV54736480	P	Pathogenic, Tier I, Tier I
067-1	NOTCH1	SNP	missense	9	139399344	A	T	5468	5100	368	7.9	26	c.4799T>A	p.(Leu1600Gln)	CTG	CAG	L	Q	NM_017617		COSV53031185	P	Uncertain Significance (Varsome), Pathogenic (Cosmic)
067-1	NOTCH1	SNP	missense	9	139397772	A	C	5797	5414	383	6.4	27	c.5029T>G	p.(Tyr1677Asp)	TAC	GAC	Y	D	NM_017617			LP	Uncertain/Pathogenic, Tier II, Tier III
