# Supplementary material
Source: Research Square preprint supplement (doi:10.21203/rs.3.rs-8620646/v1)
Supplement: Supplementary file 7 [file e07cbae70bc9ae79cbbaac00.xlsx]

## Sheet: Description
Supplementary Data 5. Results of Mann-Whitney U and permutation tests on PTEN-wild-type and PTEN-altered groups.
Results of the Mann-Whitney U and permutation tests for all seven PI3K/mTOR/AKT inhibitors in the drug profiling panel, performed on the groups PTEN-wild type (22 cases) and PTEN-altered (5 cases), with adjustment for multiple hypotheses testing (Benjamini-Hochberg).
Description of sheets and columns
Sheet name:	PTEN PI3K AKT mTOR
	Columns:	Column	Column description
		Drug	Drug name
		Class	Drug class
		Group	Target/mechanism of action subgroup within class
		n1	Number of samples in group 1 (PTEN-wild type)
		n2	Number of samples in group 1 (PTEN-altered)
		n1_mean	Mean DSS of group 1 (PTEN-wild type)
		n2_mean	Mean DSS of group 2 (PTEN-altered)
		U	Mann-Whitney U-test statistic
		p	Mann-Whitney U-test p-value
		fdr	p-value of the Mann-Whitney U test, adjusted according to the Benjamini-Hochberg procedure
		perm_stat	permutation test statistic
		perm_p	permutation test p-value
		perm_fdr	permutation test p-value, adjusted according to the Benjamini-Hochberg procedure
		perm_fdr_sig_*	Visual representation of the significativity of the permutation test FDR value: *<0.05, **<0.01, ***<0.001.

## Sheet: PTEN PI3K AKT mTOR
Drug	Class	Group	n1	n2	n1_mean	n2_mean	U	p	fdr	perm_stat	perm_p	perm_fdr	perm_fdr_sig_*
AZD-8055	B.Kinase inhibitor	PI3K/mTOR/AKT inhibitor	22	5	9.09091	26.14	20	0.027871	0.077067	-17.05	0.036196	0.085041
Buparlisib	B.Kinase inhibitor	PI3K/mTOR/AKT inhibitor	22	5	3.15455	9.38	24	0.055048	0.077067	-6.23	0.048595	0.085041
Dactolisib	B.Kinase inhibitor	PI3K/mTOR/AKT inhibitor	22	5	6.82273	8.58	40	0.376935	0.439758	-1.76	0.524748	0.612205
MK-2206	B.Kinase inhibitor	PI3K/mTOR/AKT inhibitor	22	5	7.73636	25.6	10	0.002799	0.019596	-17.86	0.005399	0.037796	*
Rapamycin	B.Kinase inhibitor	PI3K/mTOR/AKT inhibitor	22	5	8.55454	21.36	20.5	0.033346	0.077067	-12.81	0.039196	0.085041
Temsirolimus	B.Kinase inhibitor	PI3K/mTOR/AKT inhibitor	22	5	7.54545	15.34	24	0.055048	0.077067	-7.79	0.108989	0.152585
Umbralisib	B.Kinase inhibitor	PI3K/mTOR/AKT inhibitor	22	5	2.03636	2.38	45.5	0.606491	0.606491	-0.34	0.733927	0.733927
